# Supplementary material for: Somatic Mutation Allelic Ratio Test Using ddPCR (SMART-ddPCR): An Accurate Method for Assessment of Preferential Allelic Imbalance in Tumor DNA
Source: PLoS One. 2015 Nov 17;10(11):e0143343. doi: 10.1371/journal.pone.0143343 (PMC4648491; doi:10.1371/journal.pone.0143343)
Supplement: S4 Table — (XLSX) [file pone.0143343.s006.xlsx]

## Sheet: Sheet1
Region	Chr_id	Chr_pos	Reported Gene(s)	Mapped_gene	Upstream_gene_id	Downstream_gene_id	Snp_gene_ids	Upstream_gene_distance	Downstream_gene_distance	Strongest SNP-Risk Allele	SNPs	Merged	Snp_id_current	Context	Intergenic	Risk Allele Frequency	p-Value	Pvalue_mlog	p-Value (text)	OR or beta	95% CI (text)	Platform [SNPs passing QC]	CNV	Date Added to Catalog	PUBMEDID	First Author	Date	Journal	Link	Study	Disease/Trait	Initial Sample Description	Replication Sample Description
1p13.2	1	113905767	PTPN22, BCL2L15, AP4B1, DCLRE1B, HIPK1	AP4B1;DCLRE1B			10717;64858			rs11552449-T	rs11552449	0	11552449	nearGene-5;missense	0	0.17	2e-08	7.69897		1.07	[1.04-1.09]	Illumina & Affymetrix [~2.6 million] (Imputed)	N	2009-09-11	23535729	Michailidou K	2009-03-31	Nat Genet	http://www.ncbi.nlm.nih.gov/pubmed/23535729	Large-scale genotyping identifies 41 new loci associated with breast cancer risk.	Breast cancer	10,052 European ancestry cases, 12,575 European ancestry controls	45,290 European ancestry cases, 41,880 European ancestry controls
1p13.2	1	114128347	SYT6	SYT6			148281			rs2774307-?	rs2774307	0	2774307	intron	0	0.26	8e-06	5.09691		1.3	[1.16-1.47]	Illumina [487,496]	N	2009-03-25	23319801	Rafiq S	2009-01-13	Cancer Res	http://www.ncbi.nlm.nih.gov/pubmed/23319801	Identification of inherited genetic variations influencing prognosis in early-onset breast cancer.	Breast cancer (prognosis)	536 European ancestry early-onset cases	1,516 European ancestry early-onset cases
1q21.3	1	150887995	ARNT, SETDB1, LASS2, ANXA9, MCL1, CTSK	LOC100996521			100996521			rs7412746-T	rs7412746	0	7412746	intron	0	0.55	9e-11	10.0458		1.15	[NR]	Illumina [5,480,804] (imputed)	N	2007-11-01	21983785	Macgregor S	2007-10-08	Nat Genet	http://www.ncbi.nlm.nih.gov/pubmed/21983785	Genome-wide association study identifies a new melanoma susceptibility locus at 1q21.3.	Melanoma	2,168 European ancestry cases, 4,387 European ancestry controls	5,193 European ancestry cases, 15,144 European ancestry controls
1q32.1	1	204546897	MDM4	MDM4			4194			rs2290854-A	rs2290854	0	2290854	intron	0	0.31	1e-07	7		1.13	[1.08-1.18]	Illumina [2,568,349] (Imputed)	N	2009-08-01	23544013	Couch FJ	2009-03-26	PLoS Genet	http://www.ncbi.nlm.nih.gov/pubmed/23544013	Genome-wide association study in BRCA1 mutation carriers identifies novel loci associated with breast and ovarian cancer risk.	Breast Cancer in BRCA1 mutation carriers	1,426 European ancestry cases, 1,301 European ancestry controls	6,031 European ancestry cases, 5,933 European ancestry controls
1q32.1	1	204549714	MDM4, PIK3C2B, LRRN2	MDM4			4194			rs4245739-?	rs4245739	0	4245739	ncRNA	0	0.26	2e-12	11.699		1.14	[1.10-1.18]	Illumina [NR]	N	2009-09-11	23535733	Garcia-Closas M	2009-03-31	Nat Genet	http://www.ncbi.nlm.nih.gov/pubmed/23535733	Genome-wide association studies identify four ER negative-specific breast cancer risk loci.	Breast cancer	4,193 European ancestry cases, 35,194 European ancestry controls	6,514 European ancestry cases, 41,455 European ancestry controls
1q32.1	1	204549714	LOC127841, LRRN2, MDM4, PIK3C2B, PLEKHA6, PPP1R15B	MDM4			4194			rs4245739-A	rs4245739	0	4245739	ncRNA	0	0.75	2e-11	10.699		1.1	[1.05-1.14]	Illumina [~2.6 million] (Imputed)	N	2009-09-15	23535732	Eeles RA	2009-03-31	Nat Genet	http://www.ncbi.nlm.nih.gov/pubmed/23535732	Identification of 23 new prostate cancer susceptibility loci using the iCOGS custom genotyping array.	Prostate cancer	11,085 European ancestry cases, 11,463 European ancestry controls	19,662 European ancestry cases, 19,715 European ancestry controls
1q32.1	1	204549714	MDM4	MDM4			4194			rs4245739-C	rs4245739	0	4245739	ncRNA	0	NR	4e-06	5.39794		1.19	[1.11-1.29]	Illumina [NR] (imputed)	N	2010-07-28	24325915	Purrington KS	2009-12-08	Carcinogenesis	http://www.ncbi.nlm.nih.gov/pubmed/24325915	Genome-wide association study identifies 25 known breast cancer susceptibility loci as risk factors for triple-negative breast cancer.	Breast cancer (estrogen-receptor negative, progesterone-receptor negative, and human epidermal growth factor-receptor negative)	1,529 European ancestry cases, 3,399 European ancestry controls	2,148 European ancestry cases, 1,309 European ancestry controls
1q44	1	247526230	OR2C3	GCSAML;GCSAML-AS1			148823;148824			rs1881797-C	rs1881797	0	1881797	intron;intron	0	0.18	7e-06	5.1549		1.52	[1.20-1.80]	Affymetrix [307,944]	N	2005-09-10	19684603	Trevino LR	2005-08-15	Nat Genet	http://www.ncbi.nlm.nih.gov/pubmed/19684603?ordinalpos=2&itool=EntrezSystem2.PEntrez.Pubmed.Pubmed_ResultsPanel.Pubmed_DefaultReportPanel.Pubmed_RVDocSum	Germline genomic variants associated with childhood acute lymphoblastic leukemia.	Acute lymphoblastic leukemia (childhood)	317 European ancestry cases, 17,958 European ancestry controls	NA
2p25.2	2	6321289	Intergenic	LINC01105 - LINC01247	150622	101929390		341.07	44.72	rs7591996-C	rs7591996	0	7591996	Intergenic	1	NR	1e-08	8		1.39	[1.23-1.54]	Illumina [698,968]	N	2009-11-28	23727862	Savage SA	2009-06-01	Nat Genet	http://www.ncbi.nlm.nih.gov/pubmed/23727862	Genome-wide association study identifies two susceptibility loci for osteosarcoma.	Osteosarcoma	694 European ancestry cases, 2,703 European ancestry controls	247 European ancestry cases, 550 European ancestry controls
2p25.1	2	9977740	C2orf48, CYS1, GRHL1, KLF11, MIR4261, RRM2, TAF1B	GRHL1			29841			rs11902236-A	rs11902236	0	11902236	intron	0	0.27	3e-08	7.52288		1.07	[1.03-1.10]	Illumina [~2.6 million] (Imputed)	N	2009-09-15	23535732	Eeles RA	2009-03-31	Nat Genet	http://www.ncbi.nlm.nih.gov/pubmed/23535732	Identification of 23 new prostate cancer susceptibility loci using the iCOGS custom genotyping array.	Prostate cancer	11,085 European ancestry cases, 11,463 European ancestry controls	19,662 European ancestry cases, 19,715 European ancestry controls
2p24.3	2	15589696	DDX1, MYCN	DDX1			1653			rs3755132-G	rs3755132	0	3755132	nearGene-5	0	0.14	1e-14	14		1.45	[1.29-1.64]	Illumina [599,255]	N	2008-07-12	22544364	Turnbull C	2008-04-28	Nat Genet	http://www.ncbi.nlm.nih.gov/pubmed/22544364	A genome-wide association study identifies susceptibility loci for Wilms tumor.	Wilms tumor	757 European ancestry cases, 1,879 European ancestry controls	1,488 European ancestry cases, 3,851 European ancestry controls
2p24.3	2	15642347	DDX1, MYCN	DDX1 - RNU5E-7P	1653	100873836		11.24	222.59	rs807624-A	rs807624	0	807624	Intergenic	1	0.35	1e-14	14		1.33	[1.22-1.45]	Illumina [599,255]	N	2008-07-12	22544364	Turnbull C	2008-04-28	Nat Genet	http://www.ncbi.nlm.nih.gov/pubmed/22544364	A genome-wide association study identifies susceptibility loci for Wilms tumor.	Wilms tumor	757 European ancestry cases, 1,879 European ancestry controls	1,488 European ancestry cases, 3,851 European ancestry controls
2p24.1	2	19121042	Intergenic	FLJ41481 - MIR4757	400945	100616307		94.34	227.39	rs12710696-?	rs12710696	0	12710696	Intergenic	1	0.36	5e-08	7.30103		1.1	[1.06-1.13]	Illumina [NR]	N	2009-09-11	23535733	Garcia-Closas M	2009-03-31	Nat Genet	http://www.ncbi.nlm.nih.gov/pubmed/23535733	Genome-wide association studies identify four ER negative-specific breast cancer risk loci.	Breast cancer	4,193 European ancestry cases, 35,194 European ancestry controls	6,514 European ancestry cases, 41,455 European ancestry controls
2p16.1	2	59272212	Intergenic	LOC101927285			101927285			rs10490113-?	rs10490113	0	10490113	intron	0	NR	5e-06	5.30103		NR	NR	Affymetrix[70,897]	N	2004-11-24	17903305	Murabito JM	2003-09-18	BMC Med Genet	http://www.ncbi.nlm.nih.gov/pubmed/17903305?ordinalpos=1&itool=EntrezSystem2.PEntrez.Pubmed.Pubmed_ResultsPanel.Pubmed_RVDocSum	A genome-wide association study of breast and prostate cancer in the NHLBI's Framingham Heart Study.	Breast cancer	58 cases, 665 controls	NA
2p16.1	2	60839531	REL	PAPOLG - LINC01185	64895	400957		37.45	8.23	rs1432295-G	rs1432295	0	1432295	Intergenic	1	0.4	2e-08	7.69897		1.22	[1.14-1.30]	Illumina [504,374]	N	2007-01-02	21037568	Enciso-Mora V	2006-10-30	Nat Genet	http://www.ncbi.nlm.nih.gov/pubmed/21037568	A genome-wide association study of Hodgkin's lymphoma identifies new susceptibility loci at 2p16.1 (REL), 8q24.21 and 10p14 (GATA3).	Hodgkin's lymphoma	589 European ancestry cases, 5,199 European ancestry controls	2,057 European ancestry cases, 3,416 European ancestry controls
2p16.1	2	60839531	NR	PAPOLG - LINC01185	64895	400957		37.45	8.23	rs1432295-G	rs1432295	0	1432295	Intergenic	1	0.4	1e-06	6		1.24	[NR]	Illumina [296,129]	N	2010-05-12	24149102	Frampton M	2009-10-21	Nat Commun	http://www.ncbi.nlm.nih.gov/pubmed/24149102	Variation at 3p24.1 and 6q23.3 influences the risk of Hodgkin's lymphoma.	Hodgkin's lymphoma	1,465 European ancestry cases, 6,417 European ancestry controls	1,071 European ancestry cases, 953 cases, 1,853 controls
2p15	2	62904596	EHBP1	EHBP1			23301			rs721048-A	rs721048	0	721048	intron	0	0.19	8e-09	8.09691		1.15	[1.10-1.21]	Illumina[310,520]	N	2004-11-24	18264098	Gudmundsson J	2004-02-09	Nat Genet	http://www.ncbi.nlm.nih.gov/pubmed/18264098?ordinalpos=1&itool=EntrezSystem2.PEntrez.Pubmed.Pubmed_ResultsPanel.Pubmed_RVDocSum	Common sequence variants on 2p15 and Xp11.22 confer susceptibility to prostate cancer.	Prostate cancer	1,854 European ancestry cases, 21,372 European ancestry controls	8,239 European ancestry cases, 7,590 European ancestry controls
2p15	2	63074029	EHBP1	OTX1 - RPL27P5	5013	100270969		16.2	34.07	rs6545977-?	rs6545977	0	6545977	Intergenic	1	NR	5e-07	6.30103		NR	NR	Illumina [541,129]	N	2005-12-28	19767753	Eeles RA	2005-09-19	Nat Genet	http://www.ncbi.nlm.nih.gov/pubmed/19767753	Identification of seven new prostate cancer susceptibility loci through a genome-wide association study.	Prostate cancer	1,854 European ancestry cases, 1,894 European ancestry controls	19,879 cases and 18,761 controls of European, East Asian, African American, Latino, and Hawaiian ancestry
2q34	2	210704998	CPS1	CPS1-IT1 - RPS27P10	29034	646233		85.12	593.88	rs2371030-G	rs2371030	0	2371030	Intergenic	1	0.091	3e-06	5.52288	(Additive model)	NR	NR	Affymetrix [271,817]	N	2009-01-24	23144319	Lee Y	2008-11-07	Carcinogenesis	http://www.ncbi.nlm.nih.gov/pubmed/23144319	Prognostic implications of genetic variants in advanced non-small cell lung cancer: a genome-wide association study.	Non-small cell lung cancer	348 Korean ancestry cases	NA
2q34	2	212432139	ERBB4	ERBB4			2066			rs13393577-T	rs13393577	0	13393577	intron	0	0.051	9e-14	13.0458		1.53	[1.37-1.70]	Affymetrix [555,525]	N	2008-04-27	22452962	Kim HC	2008-03-26	Breast Cancer Res	http://www.ncbi.nlm.nih.gov/pubmed/22452962	A genome-wide association study identifies a breast cancer risk variant in ERBB4 at 2q34: results from the Seoul Breast Cancer Study.	Breast cancer	2,273 Korean ancestry cases, 2,052 Korean ancestry controls	4,049 Korean ancestry cases, 3,845 Korean ancestry controls
2q37.3	2	241431686	NR	FARP2			9855			rs757978-T	rs757978	0	757978	missense	0	0.26	3e-06	5.52288		1.46	[1.25-1.72]	Affymetrix & Illumina [~1,500,000] (imputed)	N	2008-08-06	22700719	Slager SL	2008-06-12	Blood	http://www.ncbi.nlm.nih.gov/pubmed/22700719	Common variation at 6p21.31 (BAK1) influences the risk of chronic lymphocytic leukemia.	Chronic lymphocytic leukemia	1,121 European ancestry cases, 3,745 European ancestry controls	861 European ancestry cases, 2,033 European ancestry controls
2q37.3	2	241431686	FARP2	FARP2			9855			rs757978-A	rs757978	0	757978	missense	0	0.11	1e-07	7		1.29	[NR]	Illumina [549,934]	N	2010-01-06	23770605	Berndt SI	2009-06-15	Nat Genet	http://www.ncbi.nlm.nih.gov/pubmed/23770605	Genome-wide association study identifies multiple risk loci for chronic lymphocytic leukemia.	Chronic lymphocytic leukemia	2,179 European ancestry cases, 6,221 European ancestry controls	1,709 European ancestry cases, 6,318 European ancestry controls
2q37.3	2	241443449	ANO7, ATG4B, BOK, BOK-AS1, DTYMK, FARP2, HDLBP, SEP2,STK25, THAP4	FARP2			9855			rs3771570-A	rs3771570	0	3771570	intron	0	0.15	5e-09	8.30103		1.12	[1.08-1.17]	Illumina [~2.6 million] (Imputed)	N	2009-09-15	23535732	Eeles RA	2009-03-31	Nat Genet	http://www.ncbi.nlm.nih.gov/pubmed/23535732	Identification of 23 new prostate cancer susceptibility loci using the iCOGS custom genotyping array.	Prostate cancer	11,085 European ancestry cases, 11,463 European ancestry controls	19,662 European ancestry cases, 19,715 European ancestry controls
3p26.2	3	2804632	NR	CNTN4			152330			rs975334-C	rs975334	0	975334	intron	0	0.16	9e-07	6.04576		8.3	[3.57-19.26]	Illumina [425,706] (imputed)	N	2008-03-07	22318345	Cha PC	2008-02-08	J Hum Genet	http://www.ncbi.nlm.nih.gov/pubmed/22318345	A genome-wide association study identifies SNP in DCC is associated with gallbladder cancer in the Japanese population.	Gallbladder cancer	41 Japanese ancestry cases, 866 Japanese ancestry controls	30 Japanese ancestry cases, 898 Japanese ancestry controls
3q26.2	3	169747154	ACTRT3	SDHDP3 - TERC	29771	7012		36.58	17.46	rs13097028-?	rs13097028	0	13097028	Intergenic	1	NR	7e-07	6.1549		1.12	[1.08-1.18]	Illumina & Affymetrix [1,579,307] (imputed)	N	2011-01-20	24980573	Song F	2010-06-29	Carcinogenesis	www.ncbi.nlm.nih.gov/pubmed/24980573	Identification of a melanoma susceptibility locus and somatic mutation in TET2.	Melanoma	494 European ancestry cases, 5,628 European ancestry controls	5,383 European ancestry cases, 13,033 European ancestry controls
3q26.2	3	169759718	NR	SDHDP3 - TERC	29771	7012		49.14	4.89	rs12638862-A	rs12638862	0	12638862	Intergenic	1	0.74	2e-06	5.69897	(Any IgH translocation vs. controls)	1.37	[1.20-1.56]	Illumina [414,804] (Imputed)	N	2009-08-01	23502783	Weinhold N	2009-03-16	Nat Genet	http://www.ncbi.nlm.nih.gov/pubmed/23502783	The CCND1 c.870G&gt;A polymorphism is a risk factor for t(11;14)(q13;q32) multiple myeloma.	Multiple myeloma (IgH translocation)	up to 1,660 European ancestry cases, 7,306 European ancestry controls
3q26.2	3	169774313	MYNN, TERC	MYNN			55892			rs10936599-G	rs10936599	0	10936599	cds-synon	0	0.8	9e-14	13.0458		1.26	[1.18-1.33]	Illumina [414,804]	N	2010-03-12	23955597	Chubb D	2009-08-17	Nat Genet	http://www.ncbi.nlm.nih.gov/pubmed/23955597	Common variation at 3q26.2, 6p21.33, 17p11.2 and 22q13.1 influences multiple myeloma risk.	Multiple myeloma	2,335 European ancestry cases, 7,306 European ancestry controls	2,357 European ancestry cases, 3,684 European ancestry controls
3q26.2	3	169774313	TERC, ACTRT3, MYNN, LRRC34	MYNN			55892			rs10936599-C	rs10936599	0	10936599	cds-synon	0	0.76	5e-09	8.30103		1.18	[1.11-1.23]	Illumina [462,190]	N	2010-04-30	24163127	Figueroa JD	2009-10-23	Hum Mol Genet	http://www.ncbi.nlm.nih.gov/pubmed/24163127	Genome-wide association study identifies multiple loci associated with bladder cancer risk.	Bladder cancer	6,911 European ancestry cases, 11,818 European ancestry controls	801 cases, 1,307 controls
3q26.2	3	169862183	TERC	LRRC31			79782			rs1920116-G	rs1920116	0	1920116	intron	0	0.72	8e-09	8.09691		1.3	[1.19-1.42]	Illumina & Affymetrix [2,362,330] Imputed	N	2010-12-10	24908248	Walsh KM	2010-06-07	Nat Genet	www.ncbi.nlm.nih.gov/pubmed/24908248	Variants near TERT and TERC influencing telomere length are associated with high-grade glioma risk.	Glioma (high-grade)	1,013 European ancestry cases, 6,595 European ancestry controls	631 European ancestry cases, 1,141 European ancestry controls
4p16.3	4	1732512	TACC3,TMEM129,SLBP,FGFR3	TACC3			10460			rs798766-T	rs798766	0	798766	intron	0	0.19	1e-11	11		1.24	[1.17-1.32]	Illumina [304,703]	N	2006-04-13	20348956	Kiemeney LA	2006-03-27	Nat Genet	http://www.ncbi.nlm.nih.gov/pubmed/20348956	A sequence variant at 4p16.3 confers susceptibility to urinary bladder cancer.	Urinary bladder cancer	1,889 European ancestry cases, 39,310 European ancestry controls	2,850 European ancestry cases, 6,239 European ancestry controls
4p16.3	4	1732512	TMEM129,TACC3,FGFR3	TACC3			10460			rs798766-T	rs798766	0	798766	intron	0	0.19	4e-13	12.3979		1.2	[1.14-1.26]	Illumina [589,299]	N	2006-12-07	20972438	Rothman N	2006-10-23	Nat Genet	http://www.ncbi.nlm.nih.gov/pubmed/20972438	A multi-stage genome-wide association study of bladder cancer identifies multiple susceptibility loci.	Bladder cancer	3,532 European ancestry cases, 5,120 European ancestry controls	8,381 cases, 48,275 controls
4p16.3	4	1732512	TMEM129, TACC3, FGFR3	TACC3			10460			rs798766-T	rs798766	0	798766	intron	0	0.19	7e-25	24.1549		1.22	[1.18-1.27]	Illumina [462,190]	N	2010-04-30	24163127	Figueroa JD	2009-10-23	Hum Mol Genet	http://www.ncbi.nlm.nih.gov/pubmed/24163127	Genome-wide association study identifies multiple loci associated with bladder cancer risk.	Bladder cancer	up to 2,305 European ancestry cases, up to 3,901 European ancestry controls	up to 13,298 cases, up to 54,535 controls
4q13.3	4	73483441	AFM, RASSF6, AFP, ALB, ANKRD17, COX18, LOC72804, LOC728040	AFM			173			rs1894292-G	rs1894292	0	1894292	intron	0	0.52	5e-13	12.301		1.1	[1.06-1.12]	Illumina [~2.6 million] (Imputed)	N	2009-09-15	23535732	Eeles RA	2009-03-31	Nat Genet	http://www.ncbi.nlm.nih.gov/pubmed/23535732	Identification of 23 new prostate cancer susceptibility loci using the iCOGS custom genotyping array.	Prostate cancer	11,085 European ancestry cases, 11,463 European ancestry controls	19,662 European ancestry cases, 19,715 European ancestry controls
4q34.3	4	180047278	NR	RNA5SP173 - LINC00290	100873437	728081		1640.45	1016.81	rs1994816-A	rs1994816	0	1994816	Intergenic	1	0.14	5e-07	6.30103	(non t11;14 and t4;14 IgH translocations vs. controls)	1.76	[1.41-2.20]	Illumina [414,804] (Imputed)	N	2009-08-01	23502783	Weinhold N	2009-03-16	Nat Genet	http://www.ncbi.nlm.nih.gov/pubmed/23502783	The CCND1 c.870G&gt;A polymorphism is a risk factor for t(11;14)(q13;q32) multiple myeloma.	Multiple myeloma (IgH translocation)	up to 1,660 European ancestry cases, 7,306 European ancestry controls
4q34.3	4	181276794	LINC00290	LINC00290 - MGC45800	728081	90768		117.65	862.21	rs1454694-C	rs1454694	0	1454694	Intergenic	1	0.21	9e-08	7.04576		2.12	[1.61-2.79]	Affymetrix [308,098]	N	2010-11-05	24737549	Yoon KA	2010-04-14	Clin Cancer Res	www.ncbi.nlm.nih.gov/pubmed/24737549	Genetic variations associated with postoperative recurrence in stage I non-small cell lung cancer.	Non-small cell lung cancer (recurrence rate)	250 Korean ancestry cases	308 Korean ancestry cases
5p15.33	5	1279675	TERT	TERT			7015			rs10069690-T	rs10069690	0	10069690	intron	0	0.26	1e-10	10		1.18	[1.13-1.25]	Illumina [3,154,485] (imputed)	N	2007-11-23	22037553	Haiman CA	2007-10-29	Nat Genet	http://www.ncbi.nlm.nih.gov/pubmed/22037553	A common variant at the TERT-CLPTM1L locus is associated with estrogen receptor-negative breast cancer.	Breast cancer	1,004 African American cases, 2,745 African American controls,1,718 European ancestry cases, 3,670 European ancestry controls	2,292 European ancestry cases, 16,901 European ancestry controls
5p15.33	5	1279675	TERT	TERT			7015			rs10069690-T	rs10069690	0	10069690	intron	0	0.321	5e-12	11.301		1.15	[1.11-1.20]	Illumina [NR]	N	2009-09-11	23535733	Garcia-Closas M	2009-03-31	Nat Genet	http://www.ncbi.nlm.nih.gov/pubmed/23535733	Genome-wide association studies identify four ER negative-specific breast cancer risk loci.	Breast cancer	4,193 European ancestry cases, 35,194 European ancestry controls	6,514 European ancestry cases, 41,455 European ancestry controls
5p15.33	5	1279675	TERT	TERT			7015			rs10069690-T	rs10069690	0	10069690	intron	0	0.26	7e-09	8.1549		1.06	[1.04-1.09]	Illumina & Affymetrix [~2.6 million] (Imputed)	N	2009-09-11	23535729	Michailidou K	2009-03-31	Nat Genet	http://www.ncbi.nlm.nih.gov/pubmed/23535729	Large-scale genotyping identifies 41 new loci associated with breast cancer risk.	Breast cancer	10,052 European ancestry cases, 12,575 European ancestry controls	45,290 European ancestry cases, 41,880 European ancestry controls
5p15.33	5	1279675	TERT	TERT			7015			rs10069690-A	rs10069690	0	10069690	intron	0	NR	1e-07	7		1.24	[1.14-1.34]	Illumina [NR] (imputed)	N	2010-07-28	24325915	Purrington KS	2009-12-08	Carcinogenesis	http://www.ncbi.nlm.nih.gov/pubmed/24325915	Genome-wide association study identifies 25 known breast cancer susceptibility loci as risk factors for triple-negative breast cancer.	Breast cancer (estrogen-receptor negative, progesterone-receptor negative, and human epidermal growth factor-receptor negative)	1,529 European ancestry cases, 3,399 European ancestry controls	2,148 European ancestry cases, 1,309 European ancestry controls
5p15.33	5	1279913	TERT	TERT			7015			rs2242652-G	rs2242652	0	2242652	intron	0	0.81	3e-24	23.5229		1.15	[1.11-1.19]	NR [2.6 million] (imputed)	N	2007-08-21	21743467	Kote-Jarai Z	2007-07-09	Nat Genet	http://www.ncbi.nlm.nih.gov/pubmed/21743467	Seven prostate cancer susceptibility loci identified by a multi-stage genome-wide association study.	Prostate cancer	6,621 European ancestry cases, 6,939 European ancestry controls	22,957 European ancestry cases, 23,234 European ancestry controls, 420 East Asian ancestry cases, 433 East Asian ancestry controls, 112 African American cases, 298 African American controls, 7,140 cases, 5,455 controls
5p15.33	5	1286401	TERT	TERT			7015			rs2736100-G	rs2736100	0	2736100	intron	0	0.49	2e-17	16.699		1.27	[1.19-1.37]	Illumina [454,576]	N	2005-07-11	19578367	Shete S	2005-07-04	Nat Genet	http://www.ncbi.nlm.nih.gov/pubmed/19578367?ordinalpos=1&itool=EntrezSystem2.PEntrez.Pubmed.Pubmed_ResultsPanel.Pubmed_DefaultReportPanel.Pubmed_RVDocSum	Genome-wide association study identifies five susceptibility loci for glioma.	Glioma	1,878 European ancestry cases, 3,670 European ancestry controls	2,545 European ancestry cases, 2,953 European ancestry controls
5p15.33	5	1286401	TERT	TERT			7015			rs2736100-G	rs2736100	0	2736100	intron	0	0.5	2e-10	9.69897		1.12	[1.08-1.16]	Illumina [515,922]	N	2005-11-08	19836008	Landi MT	2005-10-14	Am J Hum Genet	http://www.ncbi.nlm.nih.gov/pubmed/19836008?itool=EntrezSystem2.PEntrez.Pubmed.Pubmed_ResultsPanel.Pubmed_RVDocSum&ordinalpos=5	A genome-wide association study of lung cancer identifies a region of chromosome 5p15 associated with risk for adenocarcinoma.	Lung adenocarcinoma	5,739 European ancestry cases, 5,848 European ancestry controls	7,561 European ancestry cases, 13,818 European ancestry controls
5p15.33	5	1286401	TERT	TERT			7015			rs2736100-T	rs2736100	0	2736100	intron	0	0.49	8e-15	14.0969		1.33	[1.18-1.50]	Illumina [298,782]	N	2006-07-11	20543847	Turnbull C	2006-06-12	Nat Genet	http://www.ncbi.nlm.nih.gov/pubmed/20543847	Variants near DMRT1, TERT and ATF7IP are associated with testicular germ cell cancer.	Testicular germ cell cancer	979 European ancestry cases, 4,947 European ancestry controls	664 European ancestry cases, 3,456 European ancestry controls
5p15.33	5	1286401	CLPTM1L,TERT	TERT			7015			rs2736100-G	rs2736100	0	2736100	intron	0	0.39	2e-22	21.699		1.46	[1.35-1.57]	Illumina [457,504]	N	2006-09-14	20700438	Hsiung CA	2006-08-04	PLoS Genet	http://www.ncbi.nlm.nih.gov/pubmed/20700438	The 5p15.33 locus is associated with risk of lung adenocarcinoma in never-smoking females in Asia.	Lung adenocarcinoma	584 East Asian ancestry cases, 585 East Asian ancestry controls	2,184 East Asian ancestry cases, 2,515 East Asian ancestry controls
5p15.33	5	1286401	TERT	TERT			7015			rs2736100-C	rs2736100	0	2736100	intron	0	0.39	3e-11	10.5229		1.27	[1.19-1.37]	Illumina [432,024]	N	2006-10-06	20871597	Miki D	2006-09-25	Nat Genet	http://www.ncbi.nlm.nih.gov/pubmed/20871597	Variation in TP63 is associated with lung adenocarcinoma susceptibility in Japanese and Korean populations.	Lung adenocarcinoma	1,004 Japanese ancestry cases, 1,900 Japanese ancestry controls	1,094 East Asian ancestry cases, 9,148 East Asian ancestry controls
5p15.33	5	1286401	TERT	TERT			7015			rs2736100-?	rs2736100	0	2736100	intron	0	NR	1e-14	14		1.25	[NR]	Illumina [424,460]	N	2007-05-31	21531791	Sanson M	2007-04-28	Hum Mol Genet	http://www.ncbi.nlm.nih.gov/pubmed/21531791	Chromosome 7p11.2 (EGFR) variation influences glioma risk.	Glioma	4,147 European ancestry cases, 7,435 European ancestry controls	NA
5p15.33	5	1286401	TERT	TERT			7015			rs2736100-C	rs2736100	0	2736100	intron	0	0.41	1e-27	27		1.27	[1.22-1.33]	Affymetrix [906,703]	N	2007-08-02	21725308	Hu Z	2007-07-02	Nat Genet	http://www.ncbi.nlm.nih.gov/pubmed/21725308	A genome-wide association study identifies two new lung cancer susceptibility loci at 13q12.12 and 22q12.2 in Han Chinese.	Lung cancer	2,331 Han Chinese ancestry cases, 3,077 Han Chinese ancestry controls	6,313 Han Chinese ancestry cases, 6,409 Han Chinese ancestry controls
5p15.33	5	1286401	TERT	TERT			7015			rs2736100-?	rs2736100	0	2736100	intron	0	NR	7e-09	8.1549		NR	NR	Illumina [489,781]	N	2007-09-20	21827660	Yang TH	2007-08-08	BMC Med Genomics	http://www.ncbi.nlm.nih.gov/pubmed/21827660	Combinations of newly confirmed Glioma-Associated loci link regions on chromosomes 1 and 9 to increased disease risk.	Glioma	781 European ancestry cases, 3,992 European ancestry controls	NA
5p15.33	5	1286401	TERT	TERT			7015			rs2736100-G	rs2736100	0	2736100	intron	0	0.494	4e-09	8.39794		1.3	[1.19-1.41]	Illumina [559,977]	N	2008-10-08	22886559	Rajaraman P	2008-08-10	Hum Genet	http://www.ncbi.nlm.nih.gov/pubmed/22886559	Genome-wide association study of glioma and meta-analysis.	Glioma	1,856 European ancestry cases, 4,955 European ancestry controls	5,015 European ancestry cases, 11,601 European ancestry controls
5p15.33	5	1286401	TERT, hTERT	TERT			7015			rs2736100-G	rs2736100	0	2736100	intron	0	0.4	4e-27	26.3979		1.38	[1.30-1.47]	Illumina [596,032]	N	2009-01-31	23143601	Lan Q	2008-11-10	Nat Genet	http://www.ncbi.nlm.nih.gov/pubmed/23143601	Genome-wide association analysis identifies new lung cancer susceptibility loci in never-smoking women in Asia.	Lung cancer	5,510 East Asian ancestry cases, 4,544 East Asian ancestry controls	1,099 East Asian ancestry cases, 2,913 East Asian ancestry controls
5p15.33	5	1286401	TERT	TERT			7015			rs2736100-C	rs2736100	0	2736100	intron	0	0.51	1e-15	15		1.39	[1.28-1.50]	Illumina & Affymetrix [2,362,330] Imputed	N	2010-12-10	24908248	Walsh KM	2010-06-07	Nat Genet	www.ncbi.nlm.nih.gov/pubmed/24908248	Variants near TERT and TERC influencing telomere length are associated with high-grade glioma risk.	Glioma (high-grade)	1,013 European ancestry cases, 6,595 European ancestry controls	631 European ancestry cases, 1,141 European ancestry controls
5p15.33	5	1287079	TERT	TERT			7015			rs2853677-C	rs2853677	0	2853677	intron	0	0.3	3e-40	39.5229		1.41	[1.32-1.50]	Illumina [538,166]	N	2008-09-19	22797724	Shiraishi K	2008-07-14	Nat Genet	http://www.ncbi.nlm.nih.gov/pubmed/22797724	A genome-wide association study identifies two new susceptibility loci for lung adenocarcinoma in the Japanese population.	Lung adenocarcinoma	1,695 Japanese ancestry cases, 5,333 Japanese ancestry controls	4,334 Japanese ancestry cases, 8,202 Japanese ancestry controls
5p15.33	5	1288432	TERT	TERT			7015			rs2853676-A	rs2853676	0	2853676	intron	0	0.73	4e-14	13.3979		1.26	[1.20-1.32]	Illumina [454,576]	N	2005-07-11	19578367	Shete S	2005-07-04	Nat Genet	http://www.ncbi.nlm.nih.gov/pubmed/19578367?ordinalpos=1&itool=EntrezSystem2.PEntrez.Pubmed.Pubmed_ResultsPanel.Pubmed_DefaultReportPanel.Pubmed_RVDocSum	Genome-wide association study identifies five susceptibility loci for glioma.	Glioma	1,878 European ancestry cases, 3,670 European ancestry controls	2,545 European ancestry cases, 2,953 European ancestry controls
5p15.33	5	1308437	TERT, CLPTM1L	TERT - MIR4457	7015	100616235		13.39	0.87	rs4635969-T	rs4635969	0	4635969	Intergenic	1	0.19	1e-23	23		1.54	[1.33-1.79]	Illumina [298,782]	N	2006-07-11	20543847	Turnbull C	2006-06-12	Nat Genet	http://www.ncbi.nlm.nih.gov/pubmed/20543847	Variants near DMRT1, TERT and ATF7IP are associated with testicular germ cell cancer.	Testicular germ cell cancer	979 European ancestry cases, 4,947 European ancestry controls	664 European ancestry cases, 3,456 European ancestry controls
5p15.33	5	1308437	TERT,CLPTM1L	TERT - MIR4457	7015	100616235		13.39	0.87	rs4635969-T	rs4635969	0	4635969	Intergenic	1	0.2	5e-24	23.301		1.39	[1.25-1.54]	Illumina [307,291]	N	2009-11-08	23666240	Ruark E	2009-05-11	Nat Genet	http://www.ncbi.nlm.nih.gov/pubmed/23666240	Identification of nine new susceptibility loci for testicular cancer, including variants near DAZL and PRDM14.	Testicular germ cell tumor	986 European ancestry cases, 4,946 European ancestry controls	1,064 European ancestry cases, 10,082 European ancestry controls
5p15.33	5	1320607	TERT, CLPTM1L	CLPTM1L			81037			rs402710-C	rs402710	0	402710	intron	0	NR	4e-06	5.39794		1.18	[1.12-1.24]	Illumina[315,194]	N	2004-12-08	18978790	McKay JD	2004-11-01	Nat Genet	http://www.ncbi.nlm.nih.gov/pubmed/18978790?ordinalpos=2&itool=EntrezSystem2.PEntrez.Pubmed.Pubmed_ResultsPanel.Pubmed_DefaultReportPanel.Pubmed_RVDocSum	Lung cancer susceptibility locus at 5p15.33.	Lung cancer	2,971 European ancestry cases, 3,746 European ancestry controls	2,899 European ancestry cases, 5,573 European ancestry controls
5p15.33	5	1321972	TERT,CLPTM1L	CLPTM1L			81037			rs401681-C	rs401681	0	401681	intron	0	0.54	5e-07	6.30103		1.11	[1.07-1.16]	Illumina [589,299]	N	2006-12-07	20972438	Rothman N	2006-10-23	Nat Genet	http://www.ncbi.nlm.nih.gov/pubmed/20972438	A multi-stage genome-wide association study of bladder cancer identifies multiple susceptibility loci.	Bladder cancer	3,532 European ancestry cases, 5,120 European ancestry controls	8,381 cases, 48,275 controls
5p15.33	5	1321972	TERT, CLPTM1L	CLPTM1L			81037			rs401681-A	rs401681	0	401681	intron	0	0.46	3e-08	7.52288		1.2	[1.12-1.28]	Illumina [594,997]	N	2007-12-09	21983787	Barrett JH	2007-10-08	Nat Genet	http://www.ncbi.nlm.nih.gov/pubmed/21983787	Genome-wide association study identifies three new melanoma susceptibility loci.	Melanoma	2,804 European ancestry cases, 7,618 European ancestry controls	5,551 European ancestry cases, 7,449 European ancestry controls
5p15.33	5	1321972	CLPTM1L, TERT	CLPTM1L			81037			rs401681-C	rs401681	0	401681	intron	0	0.56	4e-12	11.3979		1.25	[1.18-1.34]	Illumina [302,140]	N	2010-02-10	19151717	Rafnar T	2005-01-17	Nat Genet	http://www.ncbi.nlm.nih.gov/pubmed/19151717	Sequence variants at the TERT-CLPTM1L locus associate with many cancer types.	Basal cell carcinoma	1,505 European ancestry cases, 28,890 European ancestry controls	1,060 European ancestry cases, 515 European ancestry controls
5p15.33	5	1321972	TERT, CLPTML	CLPTM1L			81037			rs401681-C	rs401681	0	401681	intron	0	0.54	4e-11	10.3979		1.12	[1.08-1.16]	Illumina [462,190]	N	2010-04-30	24163127	Figueroa JD	2009-10-23	Hum Mol Genet	http://www.ncbi.nlm.nih.gov/pubmed/24163127	Genome-wide association study identifies multiple loci associated with bladder cancer risk.	Bladder cancer	up to 2,305 European ancestry cases, up to 3,901 European ancestry controls	up to 13,298 cases, up to 54,535 controls
5p15.33	5	1321972	TERT	CLPTM1L			81037			rs401681-C	rs401681	0	401681	intron	0	NR	2e-12	11.699		1.23	[1.16-1.30]	Illumina [38.5 million] (imputed)	N	2010-10-01	24403052	Stacey SN	2010-01-07	Hum Mol Genet	http://www.ncbi.nlm.nih.gov/pubmed/24403052	Germline sequence variants in TGM3 and RGS22 confer risk of basal cell carcinoma.	Basal cell carcinoma	4,208 European ancestry cases, 109,408 European ancestry controls	up to 1,480 European ancestry cases, up to 4,610 European ancestry controls
5p13.1	5	39394887	DAB2	DAB2			1601			rs2255280-T	rs2255280	0	2255280	intron	0	NR	4e-10	9.39794		1.23	[1.15-1.32]	Affymetrix [666,141]	N	2008-01-17	22158540	Wu C	2007-12-10	Nat Genet	http://www.ncbi.nlm.nih.gov/pubmed/22158540	Genome-wide association study identifies five loci associated with susceptibility to pancreatic cancer in Chinese populations.	Pancreatic cancer	981 Han Chinese ancestry cases, 1,991 Han Chinese ancestry controls	2,603 Han Chinese ancestry cases, 2,877 Han Chinese ancestry controls
5p13.1	5	40791782	PRKAA1, PTGER4	PRKAA1			5562			rs13361707-?	rs13361707	0	13361707	intron	0	NR	8e-29	28.0969		1.41	[1.32-1.49]	Affymetrix [555,896]	N	2007-12-01	22037551	Shi Y	2007-10-29	Nat Genet	http://www.ncbi.nlm.nih.gov/pubmed/22037551	A genome-wide association study identifies new susceptibility loci for non-cardia gastric cancer at 3q13.31 and 5p13.1.	Gastric cancer	1,006 Han Chinese ancestry cases, 2,273 Han Chinese ancestry controls	3,288 Han Chinese ancestry cases, 3,609 Han Chinese ancestry controls
5p12	5	44365443	FGF10	FGF10			2255			rs2121875-G	rs2121875	0	2121875	intron	0	0.34	4e-08	7.39794		1.05	[1.02-1.08]	NR [2.6 million] (imputed)	N	2007-08-21	21743467	Kote-Jarai Z	2007-07-09	Nat Genet	http://www.ncbi.nlm.nih.gov/pubmed/21743467	Seven prostate cancer susceptibility loci identified by a multi-stage genome-wide association study.	Prostate cancer	6,621 European ancestry cases, 6,939 European ancestry controls	22,957 European ancestry cases, 23,234 European ancestry controls, 420 East Asian ancestry cases, 433 East Asian ancestry controls, 112 African American cases, 298 African American controls, 7,140 cases, 5,455 controls
5p12	5	44662413	Intergenic	FGF10-AS1 - MRPS30	101927075	10884		248.42	146.51	rs4415084-T	rs4415084	0	4415084	Intergenic	1	0.42	8e-11	10.0969		1.17	[1.11-1.22]	Illumina [~296,114]	N	2007-03-03	21263130	Fletcher O	2007-01-23	J Natl Cancer Inst	http://www.ncbi.nlm.nih.gov/pubmed/21263130	Novel breast cancer susceptibility locus at 9q31.2: results of a genome-wide association study.	Breast cancer	2,839 European ancestry cases, 3,507 European ancestry controls	9,041 European ancestry cases, 8,980 European ancestry controls
5p12	5	44706396	Intergenic	FGF10-AS1 - MRPS30	101927075	10884		292.41	102.53	rs10941679-G	rs10941679	0	10941679	Intergenic	1	0.25	2e-37	36.699		1.13	[1.10-1.15]	Illumina & Affymetrix [~2.6 million] (Imputed)	N	2009-09-11	23535729	Michailidou K	2009-03-31	Nat Genet	http://www.ncbi.nlm.nih.gov/pubmed/23535729	Large-scale genotyping identifies 41 new loci associated with breast cancer risk.	Breast cancer	10,052 European ancestry cases, 12,575 European ancestry controls	45,290 European ancestry cases, 41,880 European ancestry controls
5p12	5	44874903	MRPS30	MRPS30 - HCN1	10884	348980		59.39	380.05	rs7716600-A	rs7716600	0	7716600	Intergenic	1	0.23	7e-07	6.1549		1.24	[1.14-1.34]	Illumina [285,984]	N	2006-10-14	20872241	Li J	2006-09-25	Breast Cancer Res Treat	http://www.ncbi.nlm.nih.gov/pubmed/20872241	A combined analysis of genome-wide association studies in breast cancer.	Breast cancer	2,702 European ancestry female cases, 5,726 European ancestry controls	Up to 7,386 cases, 7,576 controls
5p12	5	45285616	Intergenic	HCN1			348980			rs981782-C	rs981782	0	981782	intron	0	0.53	9e-06	5.04576		1.04	[1.01-1.08]	Perlegen[205,586]	N	2004-11-24	17529967	Easton DF	2003-05-26	Nature	http://www.ncbi.nlm.nih.gov/pubmed/17529967	Genome-wide association study identifies novel breast cancer susceptibility loci.	Breast cancer	390 cases,364 controls	26,646 cases,24,889 controls
5q11.2	5	58888234	RAB3C	RPL5P15 - PDE4D	100270836	5144		64.99	80.8	rs10472076-C	rs10472076	0	10472076	Intergenic	1	0.38	3e-08	7.52288		1.05	[1.03-1.07]	Illumina & Affymetrix [~2.6 million] (Imputed)	N	2009-09-11	23535729	Michailidou K	2009-03-31	Nat Genet	http://www.ncbi.nlm.nih.gov/pubmed/23535729	Large-scale genotyping identifies 41 new loci associated with breast cancer risk.	Breast cancer	10,052 European ancestry cases, 12,575 European ancestry controls	45,290 European ancestry cases, 41,880 European ancestry controls
5q11.2	5	59041654	PDE4D	PDE4D			5144			rs1353747-T	rs1353747	0	1353747	intron	0	0.905	3e-08	7.52288		1.09	[1.05-1.12]	Illumina & Affymetrix [~2.6 million] (Imputed)	N	2009-09-11	23535729	Michailidou K	2009-03-31	Nat Genet	http://www.ncbi.nlm.nih.gov/pubmed/23535729	Large-scale genotyping identifies 41 new loci associated with breast cancer risk.	Breast cancer	10,052 European ancestry cases, 12,575 European ancestry controls	45,290 European ancestry cases, 41,880 European ancestry controls
5q11.2	5	59111944	PDE4D	PDE4D			5144			rs10052657-C	rs10052657	0	10052657	intron	0	0.78	2e-19	18.699		1.49	[1.37-1.61]	Affymetrix [666,141]	N	2007-06-15	21642993	Wu C	2007-06-04	Nat Genet	http://www.ncbi.nlm.nih.gov/pubmed/21642993	Genome-wide association study identifies three new susceptibility loci for esophageal squamous-cell carcinoma in Chinese populations.	Esophageal cancer	2,031 Han Chinese ancestry cases, 2,044 Han Chinese ancestry controls	3,986 Han Chinese ancestry cases, 4,157 Han Chinese ancestry controls
5q14.1	5	81423306	SSBP2	SSBP2			23635			rs7732320-T	rs7732320	0	7732320	intron	0	0.11	1e-06	6		1.64	[1.34-2.00]	Illumina [314,635]	N	2008-05-15	22472174	Xiao Y	2008-04-02	Clin Cancer Res	http://www.ncbi.nlm.nih.gov/pubmed/22472174	SSBP2 variants are associated with survival in glioblastoma patients.	Glioblastoma	315 European ancestry cases	434 European ancestry cases
5q14.3	5	83689920	HAPLN1	HAPLN1			1404			rs4466137-?	rs4466137	0	4466137	intron	0	NR	3e-06	5.52288		NR	NR	Affymetrix[70,897]	N	2004-11-24	17903305	Murabito JM	2003-09-18	BMC Med Genet	http://www.ncbi.nlm.nih.gov/pubmed/17903305?ordinalpos=1&itool=EntrezSystem2.PEntrez.Pubmed.Pubmed_ResultsPanel.Pubmed_RVDocSum	A genome-wide association study of breast and prostate cancer in the NHLBI's Framingham Heart Study.	Prostate cancer	59 cases, 558 controls	NA
5q14.3	5	91979496	ARRDC3	PCBP2P3 - LDHBP3	100131236	100129283		134.97	861.34	rs421379-?	rs421379	0	421379	Intergenic	1	0.05	1e-06	6		1.61	[1.33-1.96]	Illumina [487,496]	N	2009-03-25	23319801	Rafiq S	2009-01-13	Cancer Res	http://www.ncbi.nlm.nih.gov/pubmed/23319801	Identification of inherited genetic variations influencing prognosis in early-onset breast cancer.	Breast cancer (prognosis)	536 European ancestry early-onset cases	1,516 European ancestry early-onset cases
5q14.3	5	92558085	NR	PCBP2P3 - LDHBP3	100131236	100129283		713.56	282.75	rs1027643-T	rs1027643	0	1027643	Intergenic	1	0.05	5e-10	9.30103		1.43	[1.18-1.73]	Illumina [599,255]	N	2008-07-12	22544364	Turnbull C	2008-04-28	Nat Genet	http://www.ncbi.nlm.nih.gov/pubmed/22544364	A genome-wide association study identifies susceptibility loci for Wilms tumor.	Wilms tumor	757 European ancestry cases, 1,879 European ancestry controls	1,488 European ancestry cases, 3,851 European ancestry controls
5q15	5	94474503	NR	KIAA0825			285600			rs6869388-C	rs6869388	0	6869388	intron	0	0.04	7e-06	5.1549		72.7	[11.19-472.10]	Illumina [425,706] (imputed)	N	2008-03-07	22318345	Cha PC	2008-02-08	J Hum Genet	http://www.ncbi.nlm.nih.gov/pubmed/22318345	A genome-wide association study identifies SNP in DCC is associated with gallbladder cancer in the Japanese population.	Gallbladder cancer	41 Japanese ancestry cases, 866 Japanese ancestry controls	30 Japanese ancestry cases, 898 Japanese ancestry controls
5q15	5	96766240	ERAP1	CAST;ERAP1			831;51752			rs27524-?	rs27524	0	27524	intron;intron	0	NR	7e-06	5.1549	(Total cHL)	1.22	[1.11-1.33]	Illumina [502,514]	N	2008-02-22	22286212	Urayama KY	2008-01-26	J Natl Cancer Inst	http://www.ncbi.nlm.nih.gov/pubmed/22286212	Genome-wide association study of classical Hodgkin lymphoma and Epstein-Barr virus status-defined subgroups.	Hodgkin's lymphoma	1,200 European ancestry cases, 6,417 European ancestry controls	563 European ancestry cases, 613 European ancestry controls
5q21.3	5	109613236	Intergenic	KRT18P42 - MAN2A1	391819	4124		23.58	76.13	rs367615-?	rs367615	0	367615	Intergenic	1	0.73	4e-08	7.39794	(rs10795668)	1.35	[1.20-1.49]	Illumina [2,011,668]	N	2009-04-04	23300701	Jiao S	2008-12-25	PLoS One	http://www.ncbi.nlm.nih.gov/pubmed/23300701	Genome-wide search for gene-gene interactions in colorectal cancer.	Colorectal cancer	8,380 European ancestry cases, 10,558 European ancestry controls	2,527 European ancestry cases, 2,628 European ancestry controls
5q33.3	5	158817075	EBF1	EBF1			1879			rs1432679-C	rs1432679	0	1432679	intron	0	0.435	7e-06	5.1549		1.08	[1.04-1.11]	Illumina [NR]	N	2009-09-11	23535733	Garcia-Closas M	2009-03-31	Nat Genet	http://www.ncbi.nlm.nih.gov/pubmed/23535733	Genome-wide association studies identify four ER negative-specific breast cancer risk loci.	Breast cancer	4,193 European ancestry cases, 35,194 European ancestry controls	6,514 European ancestry cases, 41,455 European ancestry controls
5q33.3	5	158817075	EBF1	EBF1			1879			rs1432679-C	rs1432679	0	1432679	intron	0	0.43	2e-14	13.699		1.07	[1.05-1.09]	Illumina & Affymetrix [~2.6 million] (Imputed)	N	2009-09-11	23535729	Michailidou K	2009-03-31	Nat Genet	http://www.ncbi.nlm.nih.gov/pubmed/23535729	Large-scale genotyping identifies 41 new loci associated with breast cancer risk.	Breast cancer	10,052 European ancestry cases, 12,575 European ancestry controls	45,290 European ancestry cases, 41,880 European ancestry controls
5q34	5	164462274	Intergenic	LOC101927835			101927835			rs6556756-?	rs6556756	0	6556756	intron	0	NR	5e-07	6.30103		NR	NR	Affymetrix[70,897]	N	2004-11-24	17903305	Murabito JM	2003-09-18	BMC Med Genet	http://www.ncbi.nlm.nih.gov/pubmed/17903305?ordinalpos=1&itool=EntrezSystem2.PEntrez.Pubmed.Pubmed_ResultsPanel.Pubmed_RVDocSum	A genome-wide association study of breast and prostate cancer in the NHLBI's Framingham Heart Study.	Breast cancer	58 cases, 665 controls	NA
5q35.2	5	173512423	BOD1, FAM44B, LOC285593, STC2	MIR8056 - BOD1	102465862	91272		164.89	94.72	rs6869841-A	rs6869841	0	6869841	Intergenic	1	0.21	5e-08	7.30103		1.07	[1.04-1.11]	Illumina [~2.6 million] (Imputed)	N	2009-09-15	23535732	Eeles RA	2009-03-31	Nat Genet	http://www.ncbi.nlm.nih.gov/pubmed/23535732	Identification of 23 new prostate cancer susceptibility loci using the iCOGS custom genotyping array.	Prostate cancer	11,085 European ancestry cases, 11,463 European ancestry controls	19,662 European ancestry cases, 19,715 European ancestry controls
5q35.2	5	174350517	NR	HMP19 - GAPDHP71	51617	2613		241.34	162.72	rs12659144-G	rs12659144	0	12659144	Intergenic	1	0.12	3e-06	5.52288	(HD vs. non-HD)	1.67	[1.35-2.07]	Illumina [414,804]	N	2009-08-01	23502783	Weinhold N	2009-03-16	Nat Genet	http://www.ncbi.nlm.nih.gov/pubmed/23502783	The CCND1 c.870G&gt;A polymorphism is a risk factor for t(11;14)(q13;q32) multiple myeloma.	Multiple myeloma (hyperdiploidy)	up to 1,660 European ancestry cases, 7,306 European ancestry controls
6p22.3	6	20694653	CDKAL1	CDKAL1			54901			rs2206734-?	rs2206734	0	2206734	intron	0	NR	8e-06	5.09691		3.45	[2.08-5.56]	Illumina [308,330]	N	2007-01-10	21139019	Walsh KM	2006-12-06	Endocr Relat Cancer	http://www.ncbi.nlm.nih.gov/pubmed/21139019	A pilot genome-wide association study shows genomic variants enriched in the non-tumor cells of patients with well-differentiated neuroendocrine tumors of the ileum.	Ileal carcinoids	239 European ancestry cases, 107 European ancestry controls	NA
6p22.3	6	20751084	NR	CDKAL1			54901			rs7747724-?	rs7747724	0	7747724	intron	0	NR	1e-06	6		1.11	[1.06-1.16]	Illumina [462,190]	N	2010-04-30	24163127	Figueroa JD	2009-10-23	Hum Mol Genet	http://www.ncbi.nlm.nih.gov/pubmed/24163127	Genome-wide association study identifies multiple loci associated with bladder cancer risk.	Bladder cancer	6,911 European ancestry cases, 11,818 European ancestry controls	801 cases, 1,307 controls
6p22.3	6	20766466	CDKAL1	CDKAL1			54901			rs4510656-C	rs4510656	0	4510656	intron	0	0.55	7e-07	6.1549		1.12	[1.08-1.18]	Illumina [462,190]	N	2010-04-30	24163127	Figueroa JD	2009-10-23	Hum Mol Genet	http://www.ncbi.nlm.nih.gov/pubmed/24163127	Genome-wide association study identifies multiple loci associated with bladder cancer risk.	Bladder cancer	6,911 European ancestry cases, 11,818 European ancestry controls	801 cases, 1,307 controls
6p22.3	6	22125735	FLJ22536, FLJ44180	CASC15			401237			rs4712653-C	rs4712653	0	4712653	intron	0	0.46	8e-17	16.0969		1.4	[NR]	Illumina [480,279]	N	2007-01-10	21124317	Wang K	2006-11-30	Nature	http://www.ncbi.nlm.nih.gov/pubmed/21124317	Integrative genomics identifies LMO1 as a neuroblastoma oncogene.	Neuroblastoma	1,627 European ancestry child cases, 3,254 European ancestry child controls	624 European ancestry child cases, 2,843 European ancestry child controls
6p22.3	6	22131700	LINC00340, FLJ44180	CASC15			401237			rs9295536-A	rs9295536	0	9295536	intron	0	0.43	8e-16	15.0969		1.36	[NR]	Illumina [426,697]	N	2008-11-01	22941191	Diskin SJ	2008-09-01	Nat Genet	http://www.ncbi.nlm.nih.gov/pubmed/22941191	Common variation at 6q16 within HACE1 and LIN28B influences susceptibility to neuroblastoma.	Neuroblastoma	2,101 European ancestry cases, 4,202 European ancestry controls	351 European ancestry cases, 780 European ancestry controls, 365 African American cases, 2,491 African American controls
6p22.3	6	22139775	FLJ22536, FLJ44180	CASC15;CASC14			401237;729177			rs6939340-G	rs6939340	0	6939340	intron;intron	0	0.5	9e-15	14.0458		1.37	[1.27-1.49]	Illumina[464,934]	N	2004-11-24	18463370	Maris JM	2004-05-08	N Engl J Med	http://www.ncbi.nlm.nih.gov/pubmed/18463370?ordinalpos=1&itool=EntrezSystem2.PEntrez.Pubmed.Pubmed_ResultsPanel.Pubmed_RVDocSum	Chromosome 6p22 locus associated with clinically aggressive neuroblastoma.	Neuroblastoma	1,032 European ancestry cases, 2,043 European ancestry controls	720 European ancestry cases, 2,128 European ancestry controls
6p21.1	6	41568689	FOXP4	FOXP4			116113			rs1983891-T	rs1983891	0	1983891	intron	0	0.41	8e-08	7.09691		1.15	[1.09-1.21]	Illumina [510,687]	N	2006-09-10	20676098	Takata R	2006-07-31	Nat Genet	http://www.ncbi.nlm.nih.gov/pubmed/20676098	Genome-wide association study identifies five new susceptibility loci for prostate cancer in the Japanese population.	Prostate cancer	1,583 Japanese ancestry cases, 3,386 Japanese ancestry controls	3,001 Japanese ancestry cases, 5,415 Japanese ancestry controls
6q16.3	6	104732910	HACE1	HACE1			57531			rs4336470-C	rs4336470	0	4336470	intron	0	0.65	3e-11	10.5229		1.26	[1.18-1.35]	Illumina [426,697]	N	2008-11-01	22941191	Diskin SJ	2008-09-01	Nat Genet	http://www.ncbi.nlm.nih.gov/pubmed/22941191	Common variation at 6q16 within HACE1 and LIN28B influences susceptibility to neuroblastoma.	Neuroblastoma	2,101 European ancestry cases, 4,202 European ancestry controls	351 European ancestry cases, 780 European ancestry controls, 365 African American cases, 2,491 African American controls
6q16.3	6	104958399	LIN28B	LIN28B			389421			rs17065417-A	rs17065417	0	17065417	intron	0	0.89	1e-08	8		1.38	[1.23-1.54]	Illumina [426,697]	N	2008-11-01	22941191	Diskin SJ	2008-09-01	Nat Genet	http://www.ncbi.nlm.nih.gov/pubmed/22941191	Common variation at 6q16 within HACE1 and LIN28B influences susceptibility to neuroblastoma.	Neuroblastoma	2,101 European ancestry cases, 4,202 European ancestry controls	351 European ancestry cases, 780 European ancestry controls, 365 African American cases, 2,491 African American controls
6q21	6	108963986	ARMC2, SESN1, CEP57L1, FOXO3, LACE1, LINC0022, LINC00222	ARMC2			84071			rs2273669-G	rs2273669	0	2273669	intron	0	0.15	8e-09	8.09691		1.07	[1.03-1.11]	Illumina [~2.6 million] (Imputed)	N	2009-09-15	23535732	Eeles RA	2009-03-31	Nat Genet	http://www.ncbi.nlm.nih.gov/pubmed/23535732	Identification of 23 new prostate cancer susceptibility loci using the iCOGS custom genotyping array.	Prostate cancer	11,085 European ancestry cases, 11,463 European ancestry controls	19,662 European ancestry cases, 19,715 European ancestry controls
6q26	6	161815043	PARK2	PARK2			5071			rs3016539-A	rs3016539	0	3016539	intron	0	0.87	7e-06	5.1549	(dominant)	1.5	[1.26-1.79]	Illumina [420,236]	N	2006-09-09	20686608	Low SK	2006-07-28	PLoS One	http://www.ncbi.nlm.nih.gov/pubmed/20686608	Genome-wide association study of pancreatic cancer in Japanese population.	Pancreatic cancer	991 Japanese ancestry cases, 5,209 Japanese ancestry controls	NA
7p11.2	7	54911231	EGFR	SEC61G - EGFR	23480	1956		151.99	107.8	rs2252586-T	rs2252586	0	2252586	Intergenic	1	0.296	8e-08	7.09691		1.18	[1.11-1.25]	Illumina [424,460]	N	2007-05-31	21531791	Sanson M	2007-04-28	Hum Mol Genet	http://www.ncbi.nlm.nih.gov/pubmed/21531791	Chromosome 7p11.2 (EGFR) variation influences glioma risk.	Glioma	4,147 European ancestry cases, 7,435 European ancestry controls	NA
7p11.2	7	55091656	EGFR	EGFR			1956			rs11979158-A	rs11979158	0	11979158	intron	0	0.83	7e-08	7.1549		1.23	[1.15-1.35]	Illumina [424,460]	N	2007-05-31	21531791	Sanson M	2007-04-28	Hum Mol Genet	http://www.ncbi.nlm.nih.gov/pubmed/21531791	Chromosome 7p11.2 (EGFR) variation influences glioma risk.	Glioma	4,147 European ancestry cases, 7,435 European ancestry controls	NA
7q36.2	7	154889200	DPP6	DPP6			1804			rs12534701-?	rs12534701	0	12534701	intron	0	0.54-0.62	2e-06	5.69897	(Fiber)	1.17	[1.09-1.24]	Illumina & Affymetrix [>2.7 million] (Imputed)	N	2010-11-06	24743840	Figueiredo JC	2010-04-16	PLoS Genet	www.ncbi.nlm.nih.gov/pubmed/24743840	Genome-wide diet-gene interaction analyses for risk of colorectal cancer.	Colorectal cancer (diet interaction)	9,287 European ancestry cases, 9,117 European ancestry controls	NA
7q36.2	7	155109147	HTR5A, PAXIP1, INSIG1	HTR5A - INSIG1	3361	3638		21.76	188.63	rs2969540-?	rs2969540	0	2969540	Intergenic	1	NR	2e-06	5.69897	(multiplicative, retrospective analysis)	NR	NR	Illumina [491,011]	N	2010-11-01	24662972	Figueroa JD	2010-03-23	Carcinogenesis	www.ncbi.nlm.nih.gov/pubmed/24662972	Genome-wide interaction study of smoking and bladder cancer risk.	Bladder cancer (smoking interaction)	560 European ancestry never smoker cases, 2,442 European ancestry ever smoker cases, 1,406 European ancestry never smoker controls, 3,005 European ancestry ever smoker controls	494 European ancestry never smoker cases, 1,927 European ancestry ever smoker cases, 2,257 European ancestry never smoker controls, 3,490 European ancestry ever smoker controls
8q21.13	8	81074718	NR	PAG1			55824			rs5003154-?	rs5003154	0	5003154	intron	0	NR	1e-06	6		1.11	[1.06-1.16]	Illumina [462,190]	N	2010-04-30	24163127	Figueroa JD	2009-10-23	Hum Mol Genet	http://www.ncbi.nlm.nih.gov/pubmed/24163127	Genome-wide association study identifies multiple loci associated with bladder cancer risk.	Bladder cancer	6,911 European ancestry cases, 11,818 European ancestry controls	801 cases, 1,307 controls
8q21.13	8	81741409	CHMP4C, FABP5, PMP2, FABP4, FABP12, IMPA1, SLC10A5, ZFAND1, SNX16	CHMP4C			92421			rs11782652-A	rs11782652	0	11782652	intron	0	0.07	6e-09	8.22185	(All invasive)	1.19	[1.12-1.26]	Illumina [2,508,744] (Imputed)	N	2009-07-11	23535730	Pharoah PD	2009-03-31	Nat Genet	http://www.ncbi.nlm.nih.gov/pubmed/23535730	GWAS meta-analysis and replication identifies three new susceptibility loci for ovarian cancer.	Ovarian cancer	3,769 European ancestry cases, 4,396 European ancestry controls	211 East Asian ancestry cases, 972 East Asian ancestry controls, 39,674 European ancestry individuals, 106 Malaysian ancestry cases, 106 Malaysian ancestry controls
8q21.13	8	81741409	CHMP4C, FABP5, PMP2, FABP4, FABP12, IMPA1, SLC10A5, ZFAND1, SNX16	CHMP4C			92421			rs11782652-A	rs11782652	0	11782652	intron	0	0.07	7e-10	9.1549	(Serious invasive)	1.24	[1.16-1.33]	Illumina [2,508,744] (Imputed)	N	2009-07-11	23535730	Pharoah PD	2009-03-31	Nat Genet	http://www.ncbi.nlm.nih.gov/pubmed/23535730	GWAS meta-analysis and replication identifies three new susceptibility loci for ovarian cancer.	Ovarian cancer	3,769 European ancestry cases, 4,396 European ancestry controls	211 East Asian ancestry cases, 972 East Asian ancestry controls, 39,674 European ancestry individuals, 106 Malaysian ancestry cases, 106 Malaysian ancestry controls
8q23.3	8	116562277	EIF3H	LINC00536 - EIF3H	100859921	8667		237.22	82.54	rs140355816-G	rs140355816	0	140355816	Intergenic	1	0.017	2e-08	7.69897		1.59	[NR]	Illumina [NR] (imputed)	N	2010-11-07	24737748	Whiffin N	2010-04-14	Hum Mol Genet	www.ncbi.nlm.nih.gov/pubmed/24737748	Identification of susceptibility loci for colorectal cancer in a genome-wide meta-analysis.	Colorectal cancer	5,626 European ancestry cases, 7,817 European ancestry controls	14,037 European ancestry cases, 15,937 European ancestry controls
8q23.3	8	116618444	EIF3H	LINC00536 - EIF3H	100859921	8667		293.39	26.37	rs16892766-A	rs16892766	0	16892766	Intergenic	1	0.07	3e-18	17.5229		1.27	[1.20-1.34]	Illumina[547,647]	N	2004-11-24	18372905	Tomlinson IP	2004-03-29	Nat Genet	http://www.ncbi.nlm.nih.gov/pubmed/18372905?ordinalpos=2&itool=EntrezSystem2.PEntrez.Pubmed.Pubmed_ResultsPanel.Pubmed_RVDocSum	A genome-wide association study identifies colorectal cancer susceptibility loci on chromosomes 10p14 and 8q23.3.	Colorectal cancer	922 European ancestry cases, 927 European ancestry controls	17,089 European ancestry cases, 16,862 European ancestry controls, 783 cases, 664 controls
8q23.3	8	116618444	EIF3H	LINC00536 - EIF3H	100859921	8667		293.39	26.37	rs16892766-?	rs16892766	0	16892766	Intergenic	1	0.08	4e-07	6.39794		1.24	[1.14-1.34]	Illumina [378,739]	N	2007-08-14	21761138	Peters U	2007-07-14	Hum Genet	http://www.ncbi.nlm.nih.gov/pubmed/21761138	Meta-analysis of new genome-wide association studies of colorectal cancer risk.	Colorectal cancer	2,906 European ancestry cases, 3,416 European ancestry controls	8,161 European ancestry cases, 9,101 European ancestry controls
8q23.3	8	116635549	NR	LINC00536 - EIF3H	100859921	8667		310.49	9.27	rs6469656-A	rs6469656	0	6469656	Intergenic	1	0.65	5e-08	7.30103	(East Asian)	1.09	[1.06-1.13]	Illumina & Affymetrix [2.4 million] (imputed)	N	2010-11-28	24836286	Zhang B	2010-05-17	Nat Genet	www.ncbi.nlm.nih.gov/pubmed/24836286	Large-scale genetic study in East Asians identifies six new loci associated with colorectal cancer risk.	Colorectal cancer	2,098 East Asian ancestry cases, 6,172 East Asian ancestry controls	12,865 East Asian ancestry cases, 25,773 East Asian ancestry controls, up to 16,984 European ancestry cases, up to 18,262 European ancestry controls
8q24.21	8	127395198	MYC	LOC101930033			101930033			rs10505477-T	rs10505477	0	10505477	intron	0	0.54	8e-13	12.0969		1.2	[NR]	Illumina [NR] (imputed)	N	2010-11-07	24737748	Whiffin N	2010-04-14	Hum Mol Genet	www.ncbi.nlm.nih.gov/pubmed/24737748	Identification of susceptibility loci for colorectal cancer in a genome-wide meta-analysis.	Colorectal cancer	5,626 European ancestry cases, 7,817 European ancestry controls	14,037 European ancestry cases, 15,937 European ancestry controls
8q24.21	8	127395198	MYC	LOC101930033			101930033			rs10505477-A	rs10505477	0	10505477	intron	0	0.49	9e-09	8.04576		1.39	[1.28-1.50]	Illumina [2,639,562] (imputed)	N	2010-11-08	24740154	Lange EM	2010-04-15	PLoS One	www.ncbi.nlm.nih.gov/pubmed/24740154	Genome-wide association scan for variants associated with early-onset prostate cancer.	Prostate cancer (early onset)	931 European ancestry cases, 4,120 European ancestry controls	2,571 European ancestry cases, 921 European ancestry controls
8q24.21	8	127401060	MYC	CCAT2;LOC101930033			101805488;101930033			rs6983267-G	rs6983267	0	6983267	ncRNA;intron	0	0.5	1e-11	11		1.13	[1.09-1.18]	Illumina & Affymetrix [2,708,280] imputed	N	2009-02-18	23266556	Peters U	2008-12-20	Gastroenterology	http://www.ncbi.nlm.nih.gov/pubmed/23266556	Identification of Genetic Susceptibility Loci for Colorectal Tumors in a Genome-Wide Meta-analysis.	Colorectal cancer	12,696 European ancestry colorectal tumor cases, 15,113 European ancestry controls	958 European ancestry colorectal tumor cases, 909 European ancestry controls, up to 2,098 East Asian ancestry colorectal tumor cases, up to 5,749 East Asian ancestry controls
8q24.21	8	127472793	MYC	CASC8			727677			rs1447295-A	rs1447295	0	1447295	intron	0	NR	6e-18	17.2218		0.51	[0.40-0.63] unit increase	Illumina [514,432] (Imputed)	N	2010-11-06	24753544	Knipe DW	2010-04-20	Cancer Epidemiol Biomarkers Prev	www.ncbi.nlm.nih.gov/pubmed/24753544	Genetic variation in prostate-specific antigen-detected prostate cancer and the effect of control selection on genetic association studies.	Prostate cancer	1,146 European ancestry cases, 1,804 European ancestry controls	1,854 European ancestry cases, 1,437 European ancestry controls
8q24.21	8	127705823	MYC, BC042052	CASC8 - CASC11	727677	100270680		223.68	24.51	rs9642880-T	rs9642880	0	9642880	Intergenic	1	0.45	9e-12	11.0458		1.22	[1.15-1.29]	Illumina[302,140]	N	2004-11-24	18794855	Kiemeney LA	2004-09-13	Nat Genet	http://www.ncbi.nlm.nih.gov/pubmed/18794855?ordinalpos=2&itool=EntrezSystem2.PEntrez.Pubmed.Pubmed_ResultsPanel.Pubmed_DefaultReportPanel.Pubmed_RVDocSum	Sequence variant on 8q24 confers susceptibility to urinary bladder cancer.	Urinary bladder cancer	1,803 European ancestry cases, 34,336 European ancestry controls	2,165 European ancestry cases, 3,800 European ancestry controls
8q24.21	8	127705823	MYC	CASC8 - CASC11	727677	100270680		223.68	24.51	rs9642880-T	rs9642880	0	9642880	Intergenic	1	0.44	7e-12	11.1549		1.21	[1.15-1.28]	Illumina [304,703]	N	2006-04-13	20348956	Kiemeney LA	2006-03-27	Nat Genet	http://www.ncbi.nlm.nih.gov/pubmed/20348956	A sequence variant at 4p16.3 confers susceptibility to urinary bladder cancer.	Urinary bladder cancer	1,889 European ancestry cases, 39,310 European ancestry controls	2,850 European ancestry cases, 6,239 European ancestry controls
8q24.21	8	127705823	MYC	CASC8 - CASC11	727677	100270680		223.68	24.51	rs9642880-T	rs9642880	0	9642880	Intergenic	1	0.45	2e-18	17.699		1.21	[1.16-1.27]	Illumina [589,299]	N	2006-12-07	20972438	Rothman N	2006-10-23	Nat Genet	http://www.ncbi.nlm.nih.gov/pubmed/20972438	A multi-stage genome-wide association study of bladder cancer identifies multiple susceptibility loci.	Bladder cancer	3,532 European ancestry cases, 5,120 European ancestry controls	8,381 cases, 48,275 controls
8q24.21	8	127707639	MYC, PVT1, POU5F1B	CASC8 - CASC11	727677	100270680		225.5	22.69	rs10094872-T	rs10094872	0	10094872	Intergenic	1	0.411	2e-07	6.69897		1.26		Illumina [34.2 million (Imputed]	N	2010-11-26	24861552	Rafnar T	2010-05-25	Hum Mol Genet	www.ncbi.nlm.nih.gov/pubmed/24861552	Genome-wide association study yields variants at 20p12.2 that associate with urinary bladder cancer.	Urinary bladder cancer	1,670 European ancestry cases, 90,180 European ancestry controls	5,241 European ancestry cases, 10,456 European ancestry controls
8q24.21	8	128182395	MIR1208, MYC	MIR1208 - LINC01263	100302281	101927774		32.21	222.87	rs11780156-T	rs11780156	0	11780156	Intergenic	1	0.16	3e-11	10.5229		1.07	[1.04-1.10]	Illumina & Affymetrix [~2.6 million] (Imputed)	N	2009-09-11	23535729	Michailidou K	2009-03-31	Nat Genet	http://www.ncbi.nlm.nih.gov/pubmed/23535729	Large-scale genotyping identifies 41 new loci associated with breast cancer risk.	Breast cancer	10,052 European ancestry cases, 12,575 European ancestry controls	45,290 European ancestry cases, 41,880 European ancestry controls
8q24.21	8	128531703	MYC,THEM75	LINC01263 - LINC00977	101927774	728724		103.79	684.76	rs10088218-G	rs10088218	0	10088218	Intergenic	1	NR	3e-09	8.52288		1.19	[1.12-1.25]	Illumina [2,056,878] (imputed)	N	2006-10-11	20852632	Goode EL	2006-09-18	Nat Genet	http://www.ncbi.nlm.nih.gov/pubmed/20852632	A genome-wide association study identifies susceptibility loci for ovarian cancer at 2q31 and 8q24.	Ovarian cancer	1,768 European ancestry cases, 2,354 European ancestry controls	8,709 European ancestry cases, 51,764 European ancestry controls
8q24.21	8	128531703	MYC	LINC01263 - LINC00977	101927774	728724		103.79	684.76	rs10088218-?	rs10088218	0	10088218	Intergenic	1	0.87	3e-12	11.5229	(All invasive)	1.18	[1.13-1.24]	Illumina [2,508,744] (Imputed)	N	2009-07-11	23535730	Pharoah PD	2009-03-31	Nat Genet	http://www.ncbi.nlm.nih.gov/pubmed/23535730	GWAS meta-analysis and replication identifies three new susceptibility loci for ovarian cancer.	Ovarian cancer	3,769 European ancestry cases, 4,396 European ancestry controls	211 East Asian ancestry cases, 972 East Asian ancestry controls, 39,674 European ancestry individuals, 106 Malaysian ancestry cases, 106 Malaysian ancestry controls
9p24.3	9	845516	DMRT1	DMRT1			1761			rs7040024-A	rs7040024	0	7040024	intron	0	NR	1e-11	11		1.7	[1.46-1.99]	Affymetrix [609,482]	N	2007-05-26	21551455	Kanetsky PA	2007-05-05	Hum Mol Genet	http://www.ncbi.nlm.nih.gov/pubmed/21551455	A second independent locus within DMRT1 is associated with testicular germ cell tumor susceptibility.	Testicular cancer	349 European ancestry cases, 919 European ancestry controls	439 European ancestry cases, 960 European ancestry controls
9p24.3	9	863635	DMRT1	DMRT1			1761			rs755383-T	rs755383	0	755383	intron	0	0.62	1e-23	23		1.37	[1.21-1.55]	Illumina [298,782]	N	2006-07-11	20543847	Turnbull C	2006-06-12	Nat Genet	http://www.ncbi.nlm.nih.gov/pubmed/20543847	Variants near DMRT1, TERT and ATF7IP are associated with testicular germ cell cancer.	Testicular germ cell cancer	979 European ancestry cases, 4,947 European ancestry controls	664 European ancestry cases, 3,456 European ancestry controls
9p24.3	9	863635	DMRT1	DMRT1			1761			rs755383-T	rs755383	0	755383	intron	0	NR	9e-10	9.04576		1.5	[1.32-1.71]	Affymetrix [609,482]	N	2007-05-26	21551455	Kanetsky PA	2007-05-05	Hum Mol Genet	http://www.ncbi.nlm.nih.gov/pubmed/21551455	A second independent locus within DMRT1 is associated with testicular germ cell tumor susceptibility.	Testicular cancer	349 European ancestry cases, 919 European ancestry controls	439 European ancestry cases, 960 European ancestry controls
9p24.3	9	863635	DMRT1	DMRT1			1761			rs755383-C	rs755383	0	755383	intron	0	NR	4e-07	6.39794		1.52	[1.3-1.79]	Illumina [NR]	N	2009-11-06	23666239	Chung CC	2009-05-11	Nat Genet	http://www.ncbi.nlm.nih.gov/pubmed/23666239	Meta-analysis identifies four new loci associated with testicular germ cell tumor.	Testicular germ cell tumor	582 European ancestry male cases, 1,056 European ancestry male controls	3,560 European ancestry male cases, 8,510 European ancestry male controls
9p24.3	9	863635	DMRT1	DMRT1			1761			rs755383-T	rs755383	0	755383	intron	0	0.63	2e-26	25.699		1.38	[1.25-1.52]	Illumina [307,291]	N	2009-11-08	23666240	Ruark E	2009-05-11	Nat Genet	http://www.ncbi.nlm.nih.gov/pubmed/23666240	Identification of nine new susceptibility loci for testicular cancer, including variants near DAZL and PRDM14.	Testicular germ cell tumor	986 European ancestry cases, 4,946 European ancestry controls	1,064 European ancestry cases, 10,082 European ancestry controls
9p24.2	9	4426631	SLC1A1	GLIS3-AS1 - SLC1A1	84850	6505		525.38	63.8	rs10974531-A	rs10974531	0	10974531	Intergenic	1	NR	5e-06	5.30103		1.24	[1.13-1.35]	Affymetrix [666,141]	N	2008-01-17	22158540	Wu C	2007-12-10	Nat Genet	http://www.ncbi.nlm.nih.gov/pubmed/22158540	Genome-wide association study identifies five loci associated with susceptibility to pancreatic cancer in Chinese populations.	Pancreatic cancer	981 Han Chinese ancestry cases, 1,991 Han Chinese ancestry controls	2,603 Han Chinese ancestry cases, 2,877 Han Chinese ancestry controls
9p24.1	9	5070831	JAK2	JAK2			3717			rs10974944-?	rs10974944	0	10974944	intron	0	NR	4e-20	19.3979		3.1	[2.40-4.00]	Affymetrix [62,775]	N	2005-03-30	19287384	Kilpivaara O	2005-03-14	Nat Genet	http://www.ncbi.nlm.nih.gov/pubmed/19287384?ordinalpos=1&itool=EntrezSystem2.PEntrez.Pubmed.Pubmed_ResultsPanel.Pubmed_DefaultReportPanel.Pubmed_RVDocSum	A germline JAK2 SNP is associated with predisposition to the development of JAK2(V617F)-positive myeloproliferative neoplasms.	Myeloproliferative neoplasms	324 European ancestry cases, 2,999 European ancestry controls	NA
9p21.3	9	21816529	CDKN2A	MTAP			4507			rs7023329-A	rs7023329	0	7023329	intron	0	0.5	4e-07	6.39794		1.18	[1.10-1.25]	Illumina [~317,000]	N	2005-07-15	19578364	Bishop DT	2005-07-04	Nat Genet	http://www.ncbi.nlm.nih.gov/pubmed/19578364?ordinalpos=2&itool=EntrezSystem2.PEntrez.Pubmed.Pubmed_ResultsPanel.Pubmed_DefaultReportPanel.Pubmed_RVDocSum	Genome-wide association study identifies three loci associated with melanoma risk.	Melanoma	1,539 European ancestry cases, 3,917 European ancestry controls	2,312 European ancestry cases, 1,867 European ancestry controls
9p21.3	9	21816529	CDKN2A, MTAP	MTAP			4507			rs7023329-?	rs7023329	0	7023329	intron	0	0.51	7e-09	8.1549		1.2	[1.14-1.28]	Illumina [594,997]	N	2007-12-09	21983787	Barrett JH	2007-10-08	Nat Genet	http://www.ncbi.nlm.nih.gov/pubmed/21983787	Genome-wide association study identifies three new melanoma susceptibility loci.	Melanoma	2,804 European ancestry cases, 7,618 European ancestry controls	5,551 European ancestry cases, 7,449 European ancestry controls
9p21.3	9	21984662	CDKN2A/B	CDKN2A			1029			rs3731217-?	rs3731217	0	3731217	intron	0	NR	2e-08	7.69897		NR	NR	Illumina [382,776] (imputed)	N	2010-03-17	23996088	Migliorini G	2009-08-29	Blood	http://www.ncbi.nlm.nih.gov/pubmed/23996088	Variation at 10p12.2 and 10p14 influences risk of childhood B-cell acute lymphoblastic leukemia and phenotype.	Acute lymphoblastic leukemia (B-cell precursor)	1,658 European ancestry child cases, 4,723 European ancestry controls	1,449 European ancestry child cases, 1,488 European ancestry controls
9p21.3	9	22033367	CDKN2A, CDKN2B	CDKN2B-AS1			100048912			rs2157719-?	rs2157719	0	2157719	intron	0	NR	5e-16	15.301		1.26	[NR]	Illumina [424,460]	N	2007-05-31	21531791	Sanson M	2007-04-28	Hum Mol Genet	http://www.ncbi.nlm.nih.gov/pubmed/21531791	Chromosome 7p11.2 (EGFR) variation influences glioma risk.	Glioma	4,147 European ancestry cases, 7,435 European ancestry controls	NA
9p21.3	9	22034720	CDKN2A, CDKN2B	CDKN2B-AS1			100048912			rs2151280-G	rs2151280	0	2151280	intron	0	NR	3e-10	9.52288		1.2	[1.14-1.27]	Illumina [38.5 million] (imputed)	N	2010-10-01	24403052	Stacey SN	2010-01-07	Hum Mol Genet	http://www.ncbi.nlm.nih.gov/pubmed/24403052	Germline sequence variants in TGM3 and RGS22 confer risk of basal cell carcinoma.	Basal cell carcinoma	4,208 European ancestry cases, 109,408 European ancestry controls	up to 1,480 European ancestry cases, up to 4,610 European ancestry controls
9p21.3	9	22043927	Intergenic	CDKN2B-AS1			100048912			rs1412829-C	rs1412829	0	1412829	intron	0	0.39	2e-10	9.69897		1.42	[1.27-1.58]	Illumina [326,506]	N	2005-07-11	19578366	Wrensch M	2005-07-04	Nat Genet	http://www.ncbi.nlm.nih.gov/pubmed/19578366?ordinalpos=1&itool=EntrezSystem2.PEntrez.Pubmed.Pubmed_ResultsPanel.Pubmed_DefaultReportPanel.Pubmed_RVDocSum	Variants in the CDKN2B and RTEL1 regions are associated with high-grade glioma susceptibility.	Glioma (high-grade)	692 European ancestry cases, 3,992 European ancestry controls	176 cases, 174 controls
9p21.3	9	22043927	CDNK2A,CDKN2B	CDKN2B-AS1			100048912			rs1412829-?	rs1412829	0	1412829	intron	0	0.89	5e-07	6.30103		1.28	[1.18-1.41]	Illumina [464,328]	N	2006-06-13	20512145	Bei JX	2006-05-29	Nat Genet	http://www.ncbi.nlm.nih.gov/pubmed/20512145	A genome-wide association study of nasopharyngeal carcinoma identifies three new susceptibility loci.	Nasopharyngeal carcinoma	1,583 Chinese ancestry cases, 1,894 Chinese ancestry controls	3,507 Chinese ancestry cases, 3,063 Chinese ancestry controls, 284 Chinese ancestry trios
9p21.3	9	22062135	CDKN2A,CDKN2B	CDKN2B-AS1;LOC102724137			100048912;102724137			rs1011970-T	rs1011970	0	1011970	intron;intron	0	0.17	3e-08	7.52288		1.09	[1.04-1.14]	Illumina [582,886]	N	2006-06-01	20453838	Turnbull C	2006-05-08	Nat Genet	http://www.ncbi.nlm.nih.gov/pubmed/20453838	Genome-wide association study identifies five new breast cancer susceptibility loci.	Breast cancer	3,659 European ancestry cases, 4,897 European ancestry controls	12,576 European ancestry cases, 12,223 European ancestry controls
9p21.3	9	22062135	CDKN2A, CDKN2B	CDKN2B-AS1;LOC102724137			100048912;102724137			rs1011970-T	rs1011970	0	1011970	intron;intron	0	0.17	6e-08	7.22185		1.06	[1.03-1.08]	Illumina & Affymetrix [~2.6 million] (Imputed)	N	2009-09-11	23535729	Michailidou K	2009-03-31	Nat Genet	http://www.ncbi.nlm.nih.gov/pubmed/23535729	Large-scale genotyping identifies 41 new loci associated with breast cancer risk.	Breast cancer	10,052 European ancestry cases, 12,575 European ancestry controls	45,290 European ancestry cases, 41,880 European ancestry controls
9p21.3	9	22068653	CDKN2A, CDKN2B	CDKN2B-AS1;LOC102724137			100048912;102724137			rs4977756-G	rs4977756	0	4977756	intron;intron	0	0.6	7e-15	14.1549		1.24	[1.19-1.30]	Illumina [454,576]	N	2005-07-11	19578367	Shete S	2005-07-04	Nat Genet	http://www.ncbi.nlm.nih.gov/pubmed/19578367?ordinalpos=1&itool=EntrezSystem2.PEntrez.Pubmed.Pubmed_ResultsPanel.Pubmed_DefaultReportPanel.Pubmed_RVDocSum	Genome-wide association study identifies five susceptibility loci for glioma.	Glioma	1,878 European ancestry cases, 3,670 European ancestry controls	2,545 European ancestry cases, 2,953 European ancestry controls
9p21.3	9	22068653	CDKN2BAS	CDKN2B-AS1;LOC102724137			100048912;102724137			rs4977756-G	rs4977756	0	4977756	intron;intron	0	0.423	1e-08	8		1.28	[1.177-1.398]	Illumina [559,977]	N	2008-10-08	22886559	Rajaraman P	2008-08-10	Hum Genet	http://www.ncbi.nlm.nih.gov/pubmed/22886559	Genome-wide association study of glioma and meta-analysis.	Glioma	1,856 European ancestry cases, 4,955 European ancestry controls	5,015 European ancestry cases, 11,601 European ancestry controls
9p21.3	9	22206988	CDKN2B, AS1	UBA52P6 - DMRTA1	100130239	63951		194.45	239.85	rs1679013-C	rs1679013	0	1679013	Intergenic	1	0.52	1e-08	8		1.19	[1.12-1.27]	Illumina [549,934]	N	2010-01-06	23770605	Berndt SI	2009-06-15	Nat Genet	http://www.ncbi.nlm.nih.gov/pubmed/23770605	Genome-wide association study identifies multiple risk loci for chronic lymphocytic leukemia.	Chronic lymphocytic leukemia	2,179 European ancestry cases, 6,221 European ancestry controls	1,709 European ancestry cases, 6,318 European ancestry controls
9p21.1	9	28587996	LINGO2	LINGO2			158038			rs2891316-?	rs2891316	0	2891316	intron	0	NR	9e-06	5.04576	(European, All type I)	NR	NR	Illumina [873,935]	N	2010-05-11	24096698	De Vivo I	2009-10-05	Hum Genet	http://www.ncbi.nlm.nih.gov/pubmed/24096698	Genome-wide association study of endometrial cancer in E2C2.	Endometrial cancer	up to 2,695 European ancestry cases, up to 2,777 European ancestry controls	up to 3,235 cases, up to 12,059 controls
9q34.2	9	133273813	ABO	ABO			28			rs505922-C	rs505922	0	505922	intron	0	0.35	5e-08	7.30103		1.2	[1.12-1.28]	Illumina [558,542]	N	2005-09-03	19648918	Amundadottir L	2005-08-01	Nat Genet	http://www.ncbi.nlm.nih.gov/pubmed/19648918?ordinalpos=1&itool=EntrezSystem2.PEntrez.Pubmed.Pubmed_ResultsPanel.Pubmed_DefaultReportPanel.Pubmed_RVDocSum	Genome-wide association study identifies variants in the ABO locus associated with susceptibility to pancreatic cancer.	Pancreatic cancer	1,771 European ancestry cases, 1,805 European ancestry controls	2,120 European ancestry cases, 2,127 European ancestry controls
10p15.1	10	4634004	NR	LINC00703 - LINC00704	100507059	100216001		223.39	16.18	rs7086888-G	rs7086888	0	7086888	Intergenic	1	0.07	8e-06	5.09691	(non t11;14 and t4;14 IgH translocations vs. controls)	1.87	[1.42-2.46]	Illumina [414,804] (Imputed)	N	2009-08-01	23502783	Weinhold N	2009-03-16	Nat Genet	http://www.ncbi.nlm.nih.gov/pubmed/23502783	The CCND1 c.870G&gt;A polymorphism is a risk factor for t(11;14)(q13;q32) multiple myeloma.	Multiple myeloma (IgH translocation)	up to 1,660 European ancestry cases, 7,306 European ancestry controls
10p15.1	10	5762568	C10orf18, GDI2	FAM208B			54906			rs2797501-A	rs2797501	0	2797501	missense	0	NR	8e-06	5.09691		1.61	[1.30-1.96]	Illumina [698,968]	N	2009-11-28	23727862	Savage SA	2009-06-01	Nat Genet	http://www.ncbi.nlm.nih.gov/pubmed/23727862	Genome-wide association study identifies two susceptibility loci for osteosarcoma.	Osteosarcoma	694 European ancestry cases, 2,703 European ancestry controls	247 European ancestry cases, 550 European ancestry controls
10p15.1	10	5844771	ANKRD16,FBXO18	NRBF2P5 - TRNAV26	100118954	100189342		66	8.94	rs2380205-C	rs2380205	0	2380205	Intergenic	1	0.57	5e-07	6.30103		1.06	[1.02-1.10]	Illumina [582,886]	N	2006-06-01	20453838	Turnbull C	2006-05-08	Nat Genet	http://www.ncbi.nlm.nih.gov/pubmed/20453838	Genome-wide association study identifies five new breast cancer susceptibility loci.	Breast cancer	3,659 European ancestry cases, 4,897 European ancestry controls	12,576 European ancestry cases, 12,223 European ancestry controls
10q24.2	10	99529178	NR	LOC101927324			101927324			rs12412391-G	rs12412391	0	12412391	intron	0	0.42	7e-07	6.1549	(East Asian)	1.08	[1.05-1.11]	Illumina & Affymetrix [2.4 million] (imputed)	N	2010-11-28	24836286	Zhang B	2010-05-17	Nat Genet	www.ncbi.nlm.nih.gov/pubmed/24836286	Large-scale genetic study in East Asians identifies six new loci associated with colorectal cancer risk.	Colorectal cancer	2,098 East Asian ancestry cases, 6,172 East Asian ancestry controls	12,865 East Asian ancestry cases, 25,773 East Asian ancestry controls, up to 16,984 European ancestry cases, up to 18,262 European ancestry controls
10q24.2	10	99585609	SLC25A28, NKX2-3, ABCC2, MRP2	NKX2-3 - SLC25A28	159296	81894		49.09	24.91	rs1035209-T	rs1035209	0	1035209	Intergenic	1	0.195	5e-11	10.301		1.12	[1.08-1.16]	Illumina [NR] (imputed)	N	2010-11-07	24737748	Whiffin N	2010-04-14	Hum Mol Genet	www.ncbi.nlm.nih.gov/pubmed/24737748	Identification of susceptibility loci for colorectal cancer in a genome-wide meta-analysis.	Colorectal cancer	5,626 European ancestry cases, 7,817 European ancestry controls	14,037 European ancestry cases, 15,937 European ancestry controls
10q24.32	10	102654464	ACTR1A, ARL3, AS3MT, C10orf32, C10orf32-AS3MT, C10orf95,CNNM2, CUEDC2, CYP17A1, FBXL15, LOC100505761,MIR146B, PSD, SFXN2, SUFU, TMEM180, TRIM8, WBP1L	TRIM8			81603			rs3850699-A	rs3850699	0	3850699	intron	0	0.71	5e-10	9.30103		1.1	[1.06-1.12]	Illumina [~2.6 million] (Imputed)	N	2009-09-15	23535732	Eeles RA	2009-03-31	Nat Genet	http://www.ncbi.nlm.nih.gov/pubmed/23535732	Identification of 23 new prostate cancer susceptibility loci using the iCOGS custom genotyping array.	Prostate cancer	11,085 European ancestry cases, 11,463 European ancestry controls	19,662 European ancestry cases, 19,715 European ancestry controls
10q25.1	10	105756594	NR	YWHAZP5 - RPL23AP59	86123	100271618		66.87	793.51	rs17119461-?	rs17119461	0	17119461	Intergenic	1	0.04	7e-12	11.1549		8.4	[4.20-17.0]	Illumina [491,227]	N	2007-07-19	21706340	Teerlink C	2007-06-25	Hum Genet	http://www.ncbi.nlm.nih.gov/pubmed/21706340	A unique genome-wide association analysis in extended Utah high-risk pedigrees identifies a novel melanoma risk variant on chromosome arm 10q.	Melanoma	156 European ancestry cases from 34 high-risk families, 2,150 European ancestry controls	NA
10q25.2	10	110277217	NR	MXI1			4601			rs11195062-A	rs11195062	0	11195062	intron	0	NR	3e-06	5.52288		1.13	[NR]	Illumina [414,804]	N	2010-03-12	23955597	Chubb D	2009-08-17	Nat Genet	http://www.ncbi.nlm.nih.gov/pubmed/23955597	Common variation at 3q26.2, 6p21.33, 17p11.2 and 22q13.1 influences multiple myeloma risk.	Multiple myeloma	2,335 European ancestry cases, 7,306 European ancestry controls	2,357 European ancestry cases, 3,684 European ancestry controls
11q13.3	11	69419726	NR	IFITM9P - CCND1	390218	595		115.92	221.38	rs4980785-?	rs4980785	0	4980785	Intergenic	1	NR	2e-06	5.69897		NR	NR	Illumina [533,191]	N	2007-11-08	22010048	Wu X	2007-10-17	Hum Mol Genet	http://www.ncbi.nlm.nih.gov/pubmed/22010048	A genome-wide association study identifies a novel susceptibility locus for renal cell carcinoma on 12p11.23.	Renal cell carcinoma	894 European ancestry cases, 1,516 European ancestry controls	3,772 European ancestry cases, 8,505 European ancestry controls
11q13.3	11	69492927	CCND1	LOC101928292			101928292			rs537626-?	rs537626	0	537626	ncRNA	0	0.18	2e-15	14.699		1.29	[1.21-1.37]	Illumina [1,265,548] (Imputed)	N	2010-10-16	24493630	Ahsan H	2010-02-02	Cancer Epidemiol Biomarkers Prev	http://www.ncbi.nlm.nih.gov/pubmed/24493630	A genome-wide association study of early-onset breast cancer identifies PFKM as a novel breast cancer gene and supports a common genetic spectrum for breast cancer at any age.	Breast cancer (early onset)	3,523 European ancestry young female cases, 2,702 European ancestry young female controls	3,470 European ancestry young female cases, 5,475 European ancestry young female controls
11q13.3	11	69513996	MYEOV,CCND1,ORAOV1,FGF19,FGF4,FGF3	IFITM9P - CCND1	390218	595		210.19	127.11	rs614367-T	rs614367	0	614367	Intergenic	1	0.15	3e-15	14.5229		1.15	[1.10-1.20]	Illumina [582,886]	N	2006-06-01	20453838	Turnbull C	2006-05-08	Nat Genet	http://www.ncbi.nlm.nih.gov/pubmed/20453838	Genome-wide association study identifies five new breast cancer susceptibility loci.	Breast cancer	3,659 European ancestry cases, 4,897 European ancestry controls	12,576 European ancestry cases, 12,223 European ancestry controls
11q13.3	11	69513996	Intergenic	IFITM9P - CCND1	390218	595		210.19	127.11	rs614367-T	rs614367	0	614367	Intergenic	1	0.15	2e-63	62.699		1.21	[1.18-1.24]	Illumina & Affymetrix [~2.6 million] (Imputed)	N	2009-09-11	23535729	Michailidou K	2009-03-31	Nat Genet	http://www.ncbi.nlm.nih.gov/pubmed/23535729	Large-scale genotyping identifies 41 new loci associated with breast cancer risk.	Breast cancer	10,052 European ancestry cases, 12,575 European ancestry controls	45,290 European ancestry cases, 41,880 European ancestry controls
11q13.3	11	69513996	CCND1	IFITM9P - CCND1	390218	595		210.19	127.11	rs614367-?	rs614367	0	614367	Intergenic	1	0.16	1e-08	8		1.34	[NR]	Illumina [1,265,548] (Imputed)	N	2010-10-16	24493630	Ahsan H	2010-02-02	Cancer Epidemiol Biomarkers Prev	http://www.ncbi.nlm.nih.gov/pubmed/24493630	A genome-wide association study of early-onset breast cancer identifies PFKM as a novel breast cancer gene and supports a common genetic spectrum for breast cancer at any age.	Breast cancer (early onset)	3,523 European ancestry young female cases, 2,702 European ancestry young female controls	3,470 European ancestry young female cases, 5,475 European ancestry young female controls
11q13.3	11	69642525	NR	CCND1			595			rs1352075-A	rs1352075	0	1352075	intron	0	0.44	2e-06	5.69897	(HD vs. non-HD)	1.42	[1.23-1.64]	Illumina [414,804]	N	2009-08-01	23502783	Weinhold N	2009-03-16	Nat Genet	http://www.ncbi.nlm.nih.gov/pubmed/23502783	The CCND1 c.870G&gt;A polymorphism is a risk factor for t(11;14)(q13;q32) multiple myeloma.	Multiple myeloma (hyperdiploidy)	up to 1,660 European ancestry cases, 7,306 European ancestry controls
11q13.3	11	69648142	CCND1	CCND1			595			rs603965-G	rs603965	1	9344	cds-synon	0	0.56	8e-11	10.0969	(t11;14 vs. controls)	1.82	[1.52-2.19]	Illumina [414,804] (Imputed)	N	2009-08-01	23502783	Weinhold N	2009-03-16	Nat Genet	http://www.ncbi.nlm.nih.gov/pubmed/23502783	The CCND1 c.870G&gt;A polymorphism is a risk factor for t(11;14)(q13;q32) multiple myeloma.	Multiple myeloma (IgH translocation)	up to 1,660 European ancestry cases, 7,306 European ancestry controls
11q13.3	11	69648142	CCND1	CCND1			595			rs603965-G	rs603965	1	9344	cds-synon	0	0.55	2e-11	10.699	(t11;14 vs non t11;14)	1.95	[1.61-2.38]	Illumina [414,804] (Imputed)	N	2009-08-01	23502783	Weinhold N	2009-03-16	Nat Genet	http://www.ncbi.nlm.nih.gov/pubmed/23502783	The CCND1 c.870G&gt;A polymorphism is a risk factor for t(11;14)(q13;q32) multiple myeloma.	Multiple myeloma (IgH translocation)	up to 1,660 European ancestry cases, 7,306 European ancestry controls
11q22.3	11	108304735	ATM	ATM			472			rs1801516-?	rs1801516	0	1801516	missense	0	0.87	3e-09	8.52288		1.19	[1.12-1.27]	Illumina [594,997]	N	2007-12-09	21983787	Barrett JH	2007-10-08	Nat Genet	http://www.ncbi.nlm.nih.gov/pubmed/21983787	Genome-wide association study identifies three new melanoma susceptibility loci.	Melanoma	2,804 European ancestry cases, 7,618 European ancestry controls	5,551 European ancestry cases, 7,449 European ancestry controls
11q23.1	11	111300984	Intergenic	COLCA2;COLCA1			120376;399948			rs3802842-C	rs3802842	0	3802842	intron;nearGene-5	0	0.43	6e-10	9.22185		1.11	[1.08-1.15]	Illumina[541,628]	N	2004-11-24	18372901	Tenesa A	2004-03-29	Nat Genet	http://www.ncbi.nlm.nih.gov/pubmed/18372901?ordinalpos=3&itool=EntrezSystem2.PEntrez.Pubmed.Pubmed_ResultsPanel.Pubmed_RVDocSum	Genome-wide association scan identifies a colorectal cancer susceptibility locus on 11q23 and replicates risk loci at 8q24 and 18q21.	Colorectal cancer	981 European ancestry cases, 1,002 European ancestry controls	10,287 European ancestry cases, 10,401 European ancestry controls, 4,400 Japanese ancestry cases, 3,179 Japanese ancestry controls, 1,789 cases, 1,771 controls
11q23.1	11	111300984	LOC120376	COLCA2;COLCA1			120376;399948			rs3802842-?	rs3802842	0	3802842	intron;nearGene-5	0	0.28	4e-07	6.39794		1.14	[1.08-1.20]	Illumina [378,739]	N	2007-08-14	21761138	Peters U	2007-07-14	Hum Genet	http://www.ncbi.nlm.nih.gov/pubmed/21761138	Meta-analysis of new genome-wide association studies of colorectal cancer risk.	Colorectal cancer	2,906 European ancestry cases, 3,416 European ancestry controls	8,161 European ancestry cases, 9,101 European ancestry controls
11q23.1	11	111300984	Intergenic	COLCA2;COLCA1			120376;399948			rs3802842-?	rs3802842	0	3802842	intron;nearGene-5	0	0.29	4e-07	6.39794		1.11	[1.06-1.15]	Illumina & Affymetrix [2,708,280] imputed	N	2009-02-18	23266556	Peters U	2008-12-20	Gastroenterology	http://www.ncbi.nlm.nih.gov/pubmed/23266556	Identification of Genetic Susceptibility Loci for Colorectal Tumors in a Genome-Wide Meta-analysis.	Colorectal cancer	12,696 European ancestry colorectal tumor cases, 15,113 European ancestry controls	958 European ancestry colorectal tumor cases, 909 European ancestry controls, up to 2,098 East Asian ancestry colorectal tumor cases, up to 5,749 East Asian ancestry controls
11q23.1	11	111300984	Intergenic	COLCA2;COLCA1			120376;399948			rs3802842-C	rs3802842	0	3802842	intron;nearGene-5	0	0.38	3e-07	6.52288	(East Asian)	1.09	[1.05-1.12]	Illumina & Affymetrix [2.4 million] (imputed)	N	2010-11-28	24836286	Zhang B	2010-05-17	Nat Genet	www.ncbi.nlm.nih.gov/pubmed/24836286	Large-scale genetic study in East Asians identifies six new loci associated with colorectal cancer risk.	Colorectal cancer	2,098 East Asian ancestry cases, 6,172 East Asian ancestry controls	12,865 East Asian ancestry cases, 25,773 East Asian ancestry controls, up to 16,984 European ancestry cases, up to 18,262 European ancestry controls
12p13.33	12	866782	NR	WNK1			65125			rs12309274-T	rs12309274	0	12309274	intron	0	0.85	3e-06	5.52288	(East Asian)	1.11	[1.06-1.16]	Illumina & Affymetrix [2.4 million] (imputed)	N	2010-11-28	24836286	Zhang B	2010-05-17	Nat Genet	www.ncbi.nlm.nih.gov/pubmed/24836286	Large-scale genetic study in East Asians identifies six new loci associated with colorectal cancer risk.	Colorectal cancer	2,098 East Asian ancestry cases, 6,172 East Asian ancestry controls	12,865 East Asian ancestry cases, 25,773 East Asian ancestry controls, up to 16,984 European ancestry cases, up to 18,262 European ancestry controls
13q34	13	113004794	NR	MCF2L			23263			rs4907479-?	rs4907479	0	4907479	intron	0	NR	3e-06	5.52288		1.13	[1.07-1.18]	Illumina [462,190]	N	2010-04-30	24163127	Figueroa JD	2009-10-23	Hum Mol Genet	http://www.ncbi.nlm.nih.gov/pubmed/24163127	Genome-wide association study identifies multiple loci associated with bladder cancer risk.	Bladder cancer	6,911 European ancestry cases, 11,818 European ancestry controls	801 cases, 1,307 controls
14q11.2	14	23116124	CEBPE	C14orf119 - CEBPE	55017	1053		15.67	1.18	rs4982731-C	rs4982731	0	4982731	Intergenic	1	0.28	9e-12	11.0458		1.36	[1.24-1.48]	Affymetrix [709,059]	N	2009-07-25	23512250	Xu H	2009-03-18	J Natl Cancer Inst	http://www.ncbi.nlm.nih.gov/pubmed/23512250	Novel susceptibility variants at 10p12.31-12.2 for childhood acute lymphoblastic leukemia in ethnically diverse populations.	Acute lymphoblastic leukemia (childhood)	972 European ancestry cases, 1,386 European ancestry controls, 89 African American cases, 1,363 African American controls, 305 Hispanic cases, 1,008 Hispanic controls	574 European ancestry cases, 2,601 European ancestry controls, 128 African American cases, 1,075 African American controls, 143 Hispanic cases, 640 Hispanic controls
14q11.2	14	23119848	CEBPE	CEBPE			1053			rs2239633-G	rs2239633	0	2239633	nearGene-5	0	0.52	3e-07	6.52288		1.34	[1.22-1.45]	Illumina [291,473]	N	2005-09-03	19684604	Papaemmanuil E	2005-08-15	Nat Genet	http://www.ncbi.nlm.nih.gov/pubmed/19684604	Loci on 7p12.2, 10q21.2 and 14q11.2 are associated with risk of childhood acute lymphoblastic leukemia.	Acute lymphoblastic leukemia (childhood)	907 European ancestry cases, 2,398 European ancestry controls	NA
14q11.2	14	23119848	CEBPE	CEBPE			1053			rs2239633-?	rs2239633	0	2239633	nearGene-5	0	NR	1e-16	16		NR	NR	Illumina [382,776] (imputed)	N	2010-03-17	23996088	Migliorini G	2009-08-29	Blood	http://www.ncbi.nlm.nih.gov/pubmed/23996088	Variation at 10p12.2 and 10p14 influences risk of childhood B-cell acute lymphoblastic leukemia and phenotype.	Acute lymphoblastic leukemia (B-cell precursor)	1,658 European ancestry child cases, 4,723 European ancestry controls	1,449 European ancestry child cases, 1,488 European ancestry controls
14q13.3	14	36180040	NKX2-1	PTCSC3 - MBIP	100886964	51562		3.39	118.52	rs944289-T	rs944289	0	944289	Intergenic	1	0.57	2e-09	8.69897		1.37	[1.24-1.52]	Illumina [304,083]	N	2005-02-27	19198613	Gudmundsson J	2005-02-05	Nat Genet	http://www.ncbi.nlm.nih.gov/pubmed/19198613?ordinalpos=1&itool=EntrezSystem2.PEntrez.Pubmed.Pubmed_ResultsPanel.Pubmed_DefaultReportPanel.Pubmed_RVDocSum	Common variants on 9q22.33 and 14q13.3 predispose to thyroid cancer in European populations.	Thyroid cancer	192 European ancestry cases, 37,196 European ancestry controls	432 European ancestry cases, 1,727 European ancestry controls
14q13.3	14	36269155	MBIP	PTCSC3 - MBIP	100886964	51562		92.5	29.4	rs116909374-T	rs116909374	0	116909374	Intergenic	1	0.017	5e-11	10.301		2.09	[1.68-2.60]	Illumina [~16 million] (Imputed)	N	2008-02-08	22267200	Gudmundsson J	2008-01-21	Nat Genet	http://www.ncbi.nlm.nih.gov/pubmed/22267200	Discovery of common variants associated with low TSH levels and thyroid cancer risk.	Thyroid cancer	27,758 European ancestry individuals	1,156 European ancestry cases, up to 42,617 European ancestry controls
14q13.3	14	36663564	PAX9, SLC25A21	PAX9			5083			rs2236007-G	rs2236007	0	2236007	intron	0	0.79	2e-13	12.699		1.08	[1.05-1.1]	Illumina & Affymetrix [~2.6 million] (Imputed)	N	2009-09-11	23535729	Michailidou K	2009-03-31	Nat Genet	http://www.ncbi.nlm.nih.gov/pubmed/23535729	Large-scale genotyping identifies 41 new loci associated with breast cancer risk.	Breast cancer	10,052 European ancestry cases, 12,575 European ancestry controls	45,290 European ancestry cases, 41,880 European ancestry controls
14q24.1	14	68193711	RAD51L1	RAD51B			5890			rs2588809-T	rs2588809	0	2588809	intron	0	0.16	1e-10	10		1.08	[1.05-1.11]	Illumina & Affymetrix [~2.6 million] (Imputed)	N	2009-09-11	23535729	Michailidou K	2009-03-31	Nat Genet	http://www.ncbi.nlm.nih.gov/pubmed/23535729	Large-scale genotyping identifies 41 new loci associated with breast cancer risk.	Breast cancer	10,052 European ancestry cases, 12,575 European ancestry controls	45,290 European ancestry cases, 41,880 European ancestry controls
14q24.1	14	68232877	RAD51B	RAD51B			5890			rs1314913-?	rs1314913	0	1314913	intron	0	NR	3e-13	12.5229		1.57	[1.39-1.77]	Illumina [447,760]	N	2008-12-01	23001122	Orr N	2008-09-22	Nat Genet	http://www.ncbi.nlm.nih.gov/pubmed/23001122	Genome-wide association study identifies a common variant in RAD51B associated with male breast cancer risk.	Breast cancer (male)	823 European ancestry cases, 2,795 European ancestry controls	438 European ancestry cases, 474 European ancestry controls
14q24.1	14	68283210	RAD51L1	RAD51B			5890			rs3784099-A	rs3784099	0	3784099	intron	0	NR	1e-07	7	(Total Mortality)	1.49	[1.28-1.72]	Affymetrix [613,031]	N	2008-02-13	22232737	Shu XO	2008-01-08	Cancer Res	http://www.ncbi.nlm.nih.gov/pubmed/22232737	Novel genetic markers of breast cancer survival identified by a genome-wide association study.	Breast cancer (survival)	1,950 Chinese ancestry cases	4,160 Chinese ancestry cases
14q24.1	14	68283210	RAD51L1	RAD51B			5890			rs3784099-A	rs3784099	0	3784099	intron	0	NR	3e-07	6.52288	(Recurrence)	1.43	[1.25-1.64]	Affymetrix [613,031]	N	2008-02-13	22232737	Shu XO	2008-01-08	Cancer Res	http://www.ncbi.nlm.nih.gov/pubmed/22232737	Novel genetic markers of breast cancer survival identified by a genome-wide association study.	Breast cancer (survival)	1,950 Chinese ancestry cases	4,160 Chinese ancestry cases
14q24.1	14	68567965	RAD51L1	RAD51B			5890			rs999737-C	rs999737	0	999737	intron	0	0.76	2e-07	6.69897		1.06	[1.01-1.14]	Illumina [528,173]	N	2005-04-02	19330030	Thomas G	2005-03-28	Nat Genet	http://www.ncbi.nlm.nih.gov/pubmed/19330030?ordinalpos=3&itool=EntrezSystem2.PEntrez.Pubmed.Pubmed_ResultsPanel.Pubmed_DefaultReportPanel.Pubmed_RVDocSum	A multistage genome-wide association study in breast cancer identifies two new risk alleles at 1p11.2 and 14q24.1 (RAD51L1).	Breast cancer	1,145 European ancestry cases, 1,142 European ancestry controls	8,625 European ancestry cases, 9,657 European ancestry controls
14q24.1	14	68567965	RAD51L1	RAD51B			5890			rs999737-C	rs999737	0	999737	intron	0	0.77	3e-19	18.5229		1.09	[1.06-1.11]	Illumina & Affymetrix [~2.6 million] (Imputed)	N	2009-09-11	23535729	Michailidou K	2009-03-31	Nat Genet	http://www.ncbi.nlm.nih.gov/pubmed/23535729	Large-scale genotyping identifies 41 new loci associated with breast cancer risk.	Breast cancer	10,052 European ancestry cases, 12,575 European ancestry controls	45,290 European ancestry cases, 41,880 European ancestry controls
14q24.1	14	68660027	ACTN1, RAD51B, ZFP36L1	RAD51B			5890			rs7141529-G	rs7141529	0	7141529	intron	0	0.5	3e-10	9.52288		1.09	[1.06-1.12]	Illumina [~2.6 million] (Imputed)	N	2009-09-15	23535732	Eeles RA	2009-03-31	Nat Genet	http://www.ncbi.nlm.nih.gov/pubmed/23535732	Identification of 23 new prostate cancer susceptibility loci using the iCOGS custom genotyping array.	Prostate cancer	11,085 European ancestry cases, 11,463 European ancestry controls	19,662 European ancestry cases, 19,715 European ancestry controls
14q32.32	14	103018488	CDC42BPB	CDC42BPB			9578			rs751837-?	rs751837	0	751837	intron	0	NR	3e-07	6.52288		3.51	[2.13-5.88]	Illumina [444,361]	N	2007-05-25	21471979	Kumar V	2007-04-06	J Hum Genet	http://www.ncbi.nlm.nih.gov/pubmed/21471979	Common variants on 14q32 and 13q12 are associated with DLBCL susceptibility.	Large B-cell lymphoma	74 Japanese ancestry cases, 934 Japanese ancestry controls	325 Japanese ancestry cases, 3,309 Japanese ancestry controls
15q13.1	15	28243742	NR	HERC2			8924			rs8028689-G	rs8028689	0	8028689	intron	0	0.05	7e-06	5.1549	(Any IgH translocation vs. controls)	1.65	[1.33-2.05]	Illumina [414,804] (Imputed)	N	2009-08-01	23502783	Weinhold N	2009-03-16	Nat Genet	http://www.ncbi.nlm.nih.gov/pubmed/23502783	The CCND1 c.870G&gt;A polymorphism is a risk factor for t(11;14)(q13;q32) multiple myeloma.	Multiple myeloma (IgH translocation)	up to 1,660 European ancestry cases, 7,306 European ancestry controls
15q13.3	15	32702555	Intergenic	SCG5 - GREM1	6447	26585		5.46	15.42	rs4779584-?	rs4779584	0	4779584	Intergenic	1	0.19	5e-07	6.30103		1.23	[1.14-1.34]	Illumina[547,647]	N	2004-11-24	18372905	Tomlinson IP	2004-03-29	Nat Genet	http://www.ncbi.nlm.nih.gov/pubmed/18372905?ordinalpos=2&itool=EntrezSystem2.PEntrez.Pubmed.Pubmed_ResultsPanel.Pubmed_RVDocSum	A genome-wide association study identifies colorectal cancer susceptibility loci on chromosomes 10p14 and 8q23.3.	Colorectal cancer	922 European ancestry cases, 927 European ancestry controls	17,089 European ancestry cases, 16,862 European ancestry controls, 783 cases, 664 controls
15q13.3	15	32702555	SCG5, GREM1	SCG5 - GREM1	6447	26585		5.46	15.42	rs4779584-?	rs4779584	0	4779584	Intergenic	1	0.19	2e-08	7.69897		1.18	[1.11-1.24]	Illumina [378,739]	N	2007-08-14	21761138	Peters U	2007-07-14	Hum Genet	http://www.ncbi.nlm.nih.gov/pubmed/21761138	Meta-analysis of new genome-wide association studies of colorectal cancer risk.	Colorectal cancer	2,906 European ancestry cases, 3,416 European ancestry controls	8,161 European ancestry cases, 9,101 European ancestry controls
15q13.3	15	32702555	CRAC1, HMPS, GREM1	SCG5 - GREM1	6447	26585		5.46	15.42	rs4779584-?	rs4779584	0	4779584	Intergenic	1	0.18	5e-07	6.30103		1.12	[1.08-1.19]	Illumina & Affymetrix [2,708,280] imputed	N	2009-02-18	23266556	Peters U	2008-12-20	Gastroenterology	http://www.ncbi.nlm.nih.gov/pubmed/23266556	Identification of Genetic Susceptibility Loci for Colorectal Tumors in a Genome-Wide Meta-analysis.	Colorectal cancer	12,696 European ancestry colorectal tumor cases, 15,113 European ancestry controls	958 European ancestry colorectal tumor cases, 909 European ancestry controls, up to 2,098 East Asian ancestry colorectal tumor cases, up to 5,749 East Asian ancestry controls
15q13.3	15	32720301	GREM1, SCG5	GREM1;LOC100131315			26585;100131315			rs73376930-G	rs73376930	0	73376930	intron;nearGene-5	0	0.207	1e-11	11		1.25	[NR]	Illumina [NR] (imputed)	N	2010-11-07	24737748	Whiffin N	2010-04-14	Hum Mol Genet	www.ncbi.nlm.nih.gov/pubmed/24737748	Identification of susceptibility loci for colorectal cancer in a genome-wide meta-analysis.	Colorectal cancer	5,626 European ancestry cases, 7,817 European ancestry controls	14,037 European ancestry cases, 15,937 European ancestry controls
15q13.3	15	32834253	FMN1	FMN1			342184			rs1258767-?	rs1258767	0	1258767	intron	0	NR	7e-07	6.1549	(additive, retrospective analysis)	NR	NR	Illumina [491,011]	N	2010-11-01	24662972	Figueroa JD	2010-03-23	Carcinogenesis	www.ncbi.nlm.nih.gov/pubmed/24662972	Genome-wide interaction study of smoking and bladder cancer risk.	Bladder cancer (smoking interaction)	560 European ancestry never smoker cases, 2,442 European ancestry ever smoker cases, 1,406 European ancestry never smoker controls, 3,005 European ancestry ever smoker controls	494 European ancestry never smoker cases, 1,927 European ancestry ever smoker cases, 2,257 European ancestry never smoker controls, 3,490 European ancestry ever smoker controls
17p13.3	17	715725	DBIL5P, FAM57A, GEMIN4, GLOD4, NXN, RNMTL1, VPS53	VPS53			55275			rs684232-G	rs684232	0	684232	nearGene-5	0	0.36	5e-15	14.301		1.1	[1.07-1.14]	Illumina [~2.6 million] (Imputed)	N	2009-09-15	23535732	Eeles RA	2009-03-31	Nat Genet	http://www.ncbi.nlm.nih.gov/pubmed/23535732	Identification of 23 new prostate cancer susceptibility loci using the iCOGS custom genotyping array.	Prostate cancer	11,085 European ancestry cases, 11,463 European ancestry controls	19,662 European ancestry cases, 19,715 European ancestry controls
17p13.3	17	897353	NXN	NXN			64359			rs12603526-C	rs12603526	0	12603526	intron	0	0.3	3e-08	7.52288	(East Asian)	1.1	[1.06-1.14]	Illumina & Affymetrix [2.4 million] (imputed)	N	2010-11-28	24836286	Zhang B	2010-05-17	Nat Genet	www.ncbi.nlm.nih.gov/pubmed/24836286	Large-scale genetic study in East Asians identifies six new loci associated with colorectal cancer risk.	Colorectal cancer	2,098 East Asian ancestry cases, 6,172 East Asian ancestry controls	12,865 East Asian ancestry cases, 25,773 East Asian ancestry controls, up to 16,984 European ancestry cases, up to 18,262 European ancestry controls
17q24.2	17	67902693	BPTF	BPTF			2186			rs7216064-A	rs7216064	0	7216064	intron	0	0.707	7e-11	10.1549		1.2	[1.13-1.26]	Illumina [538,166]	N	2008-09-19	22797724	Shiraishi K	2008-07-14	Nat Genet	http://www.ncbi.nlm.nih.gov/pubmed/22797724	A genome-wide association study identifies two new susceptibility loci for lung adenocarcinoma in the Japanese population.	Lung adenocarcinoma	1,695 Japanese ancestry cases, 5,333 Japanese ancestry controls	4,334 Japanese ancestry cases, 8,202 Japanese ancestry controls
17q24.2	17	67902693	BPTF	BPTF			2186			rs7216064-A	rs7216064	0	7216064	intron	0	0.63	7e-06	5.1549		1.16	[1.09-1.25]	Illumina [596,032]	N	2009-01-31	23143601	Lan Q	2008-11-10	Nat Genet	http://www.ncbi.nlm.nih.gov/pubmed/23143601	Genome-wide association analysis identifies new lung cancer susceptibility loci in never-smoking women in Asia.	Lung cancer	5,510 East Asian ancestry cases, 4,544 East Asian ancestry controls	1,099 East Asian ancestry cases, 2,913 East Asian ancestry controls
18q23	18	79013973	SALL3, ATP9B	SALL3 - ATP9B	27164	374868		15	55.42	rs7241993-G	rs7241993	0	7241993	Intergenic	1	0.7	2e-09	8.69897		1.09	[1.05-1.12]	Illumina [~2.6 million] (Imputed)	N	2009-09-15	23535732	Eeles RA	2009-03-31	Nat Genet	http://www.ncbi.nlm.nih.gov/pubmed/23535732	Identification of 23 new prostate cancer susceptibility loci using the iCOGS custom genotyping array.	Prostate cancer	11,085 European ancestry cases, 11,463 European ancestry controls	19,662 European ancestry cases, 19,715 European ancestry controls
19q12	19	29805946	CCNE1	C19orf12 - CCNE1	83636	898		90.16	5.95	rs8102137-C	rs8102137	0	8102137	Intergenic	1	0.33	2e-11	10.699		1.13	[1.09-1.17]	Illumina [589,299]	N	2006-12-07	20972438	Rothman N	2006-10-23	Nat Genet	http://www.ncbi.nlm.nih.gov/pubmed/20972438	A multi-stage genome-wide association study of bladder cancer identifies multiple susceptibility loci.	Bladder cancer	3,532 European ancestry cases, 5,120 European ancestry controls	8,381 cases, 48,275 controls
19q12	19	29805946	CCNE1	C19orf12 - CCNE1	83636	898		90.16	5.95	rs8102137-C	rs8102137	0	8102137	Intergenic	1	0.33	1e-11	11		1.13	[1.09-1.17]	Illumina [462,190]	N	2010-04-30	24163127	Figueroa JD	2009-10-23	Hum Mol Genet	http://www.ncbi.nlm.nih.gov/pubmed/24163127	Genome-wide association study identifies multiple loci associated with bladder cancer risk.	Bladder cancer	up to 2,305 European ancestry cases, up to 3,901 European ancestry controls	up to 13,298 cases, up to 54,535 controls
22q13.32	22	48345986	Intergenic	MIR3201 - FAM19A5	100422916	25817		71.57	143.47	rs4407-?	rs4407	0	4407	Intergenic	1	NR	2e-06	5.69897	(Endometroid subtype)	NR	NR	Illumina [873,935]	N	2010-05-11	24096698	De Vivo I	2009-10-05	Hum Genet	http://www.ncbi.nlm.nih.gov/pubmed/24096698	Genome-wide association study of endometrial cancer in E2C2.	Endometrial cancer	up to 2,695 European ancestry cases, up to 2,777 European ancestry controls	up to 3,235 cases, up to 12,059 controls
22q13.32	22	48345986	Intergenic	MIR3201 - FAM19A5	100422916	25817		71.57	143.47	rs4407-?	rs4407	0	4407	Intergenic	1	NR	3e-06	5.52288	(European, Endometroid subtype)	NR	NR	Illumina [873,935]	N	2010-05-11	24096698	De Vivo I	2009-10-05	Hum Genet	http://www.ncbi.nlm.nih.gov/pubmed/24096698	Genome-wide association study of endometrial cancer in E2C2.	Endometrial cancer	up to 2,695 European ancestry cases, up to 2,777 European ancestry controls	up to 3,235 cases, up to 12,059 controls
22q13.32	22	48533757	FAM19A5	FAM19A5			25817			rs5768709-G	rs5768709	0	5768709	intron	0	0.23	1e-10	10		1.25	[1.17-1.34]	Affymetrix [666,141]	N	2008-01-17	22158540	Wu C	2007-12-10	Nat Genet	http://www.ncbi.nlm.nih.gov/pubmed/22158540	Genome-wide association study identifies five loci associated with susceptibility to pancreatic cancer in Chinese populations.	Pancreatic cancer	981 Han Chinese ancestry cases, 1,991 Han Chinese ancestry controls	2,603 Han Chinese ancestry cases, 2,877 Han Chinese ancestry controls
Xp22.2	X	9783434	SHROOM2	GPR143 - SHROOM2	4935	357		17.47	3.02	rs5934683-?	rs5934683	0	5934683	Intergenic	1	NR	7e-10	9.1549		1.07	[1.04-1.10]	Illumina [NR] (imputed)	N	2008-07-16	22634755	Dunlop MG	2008-05-26	Nat Genet	http://www.ncbi.nlm.nih.gov/pubmed/22634755	Common variation near CDKN1A, POLD3 and SHROOM2 influences colorectal cancer risk.	Colorectal cancer	8,323 European ancestry cases, 9,457 European ancestry controls	19,513 European ancestry cases, 17,657 European ancestry controls, 1,583 Japanese ancestry cases, 1,898 Japanese ancestry controls
Xp22.2	X	9846095	GPR143, LOC100288814, SHROOM2, TBL1X, WWC3	SHROOM2			357			rs2405942-A	rs2405942	0	2405942	intron	0	0.79	2e-10	9.69897		1.14	[1.09-1.2]	Illumina [~2.6 million] (Imputed)	N	2009-09-15	23535732	Eeles RA	2009-03-31	Nat Genet	http://www.ncbi.nlm.nih.gov/pubmed/23535732	Identification of 23 new prostate cancer susceptibility loci using the iCOGS custom genotyping array.	Prostate cancer	11,085 European ancestry cases, 11,463 European ancestry controls	19,662 European ancestry cases, 19,715 European ancestry controls
8q24.21[rs2466035]; 8q24.21[rs2456449]			MYC	-						rs2466035-C	rs2466035, rs2456449, rs2466032					0.31	2e-08			1.21	[NR]	Illumina [549,934]	N	2010-01-06	23770605	Berndt SI	2009-06-15	Nat Genet	http://www.ncbi.nlm.nih.gov/pubmed/23770605	Genome-wide association study identifies multiple risk loci for chronic lymphocytic leukemia.	Chronic lymphocytic leukemia	2,179 European ancestry cases, 6,221 European ancestry controls	1,709 European ancestry cases, 6,318 European ancestry controls
8q24.21[rs35252396]; 8q24.21[rs6470588]			MYC, PVT1	-						2-SNP haplotype	rs35252396, rs6470588, rs6470589					0.46	5e-11		(rs35252396-CG, rs6470588-C, rs6470589-G)	1.27	[1.18-1.37]	Illumina [785,863] (imputed)	N	2010-07-21	24220699	Gudmundsson J	2009-11-12	Nat Commun	http://www.ncbi.nlm.nih.gov/pubmed/24220699	A common variant at 8q24.21 is associated with renal cell cancer.	Renal cell carcinoma	1,505 European ancestry cases, 67,725 European ancestry controls	906 European ancestry cases, 3,772 European ancestry controls
4q34.3[rs1454694]; 4q34.3[rs10019279]			LINC00290	-						5-SNP haplotype	rs1454694, rs10019279, rs5012808, rs17241910, rs28431436					NR	4e-06		(CCAAG)	2.09	[1.53-2.87]	Affymetrix [308,098]	N	2010-11-05	24737549	Yoon KA	2010-04-14	Clin Cancer Res	www.ncbi.nlm.nih.gov/pubmed/24737549	Genetic variations associated with postoperative recurrence in stage I non-small cell lung cancer.	Non-small cell lung cancer (recurrence rate)	250 Korean ancestry cases	308 Korean ancestry cases
Notes
SNPs in bold are potential tumor PAI loci, i.e. those for which the associated cancer type matches the tumor type in which overlapping SCNAs were found to be recurrent in TCGA
